# Supplementary material for: CDDO-Me Alters the Tumor Microenvironment in Estrogen Receptor Negative Breast Cancer
Source: PubMed Central journal article supplement (PMC7162855; doi:10.1038/s41598-020-63482-x), 2020-04-16
Supplement: 41598_2020_63482_MOESM1_ESM.pdf [file 41598_2020_63482_MOESM1_ESM.pdf]

## **Supplemental Material (Tables and Figures)**

CDDO-Me Alters the Tumor Microenvironment in Estrogen Receptor Negative Breast Cancer

Michael S. Ball<sup>1</sup>, Rajan Bhandari<sup>1</sup>, Gretel M. Torres<sup>1</sup>, Viktor Martyanov<sup>2</sup>, Mohamed A. EITanbouly<sup>1</sup>, Kim Archambault<sup>2</sup>, Michael L. Whitfield<sup>2</sup>, Karen T. Liby<sup>3</sup>, and Patricia A. Pioli<sup>1\*</sup>

<sup>1</sup>Department of Microbiology and Immunology, Geisel School of Medicine, Lebanon, New Hampshire, United States of America

<sup>2</sup>Department of Biomedical Data Science, Geisel School of Medicine, Hanover, New Hampshire, United States of America

<sup>3</sup>Department of Pharmacology and Toxicology, Michigan State University, East Lansing, Michigan, United States of America

\*Corresponding Author: Patricia A. Pioli; One Medical Center Drive; Borwell Building, Room 644E; Lebanon, NH 03756; phone #: 603-650-2584; fax #: 603-650-6130; e-mail: [pioli@dartmouth.edu](mailto:pioli@dartmouth.edu)

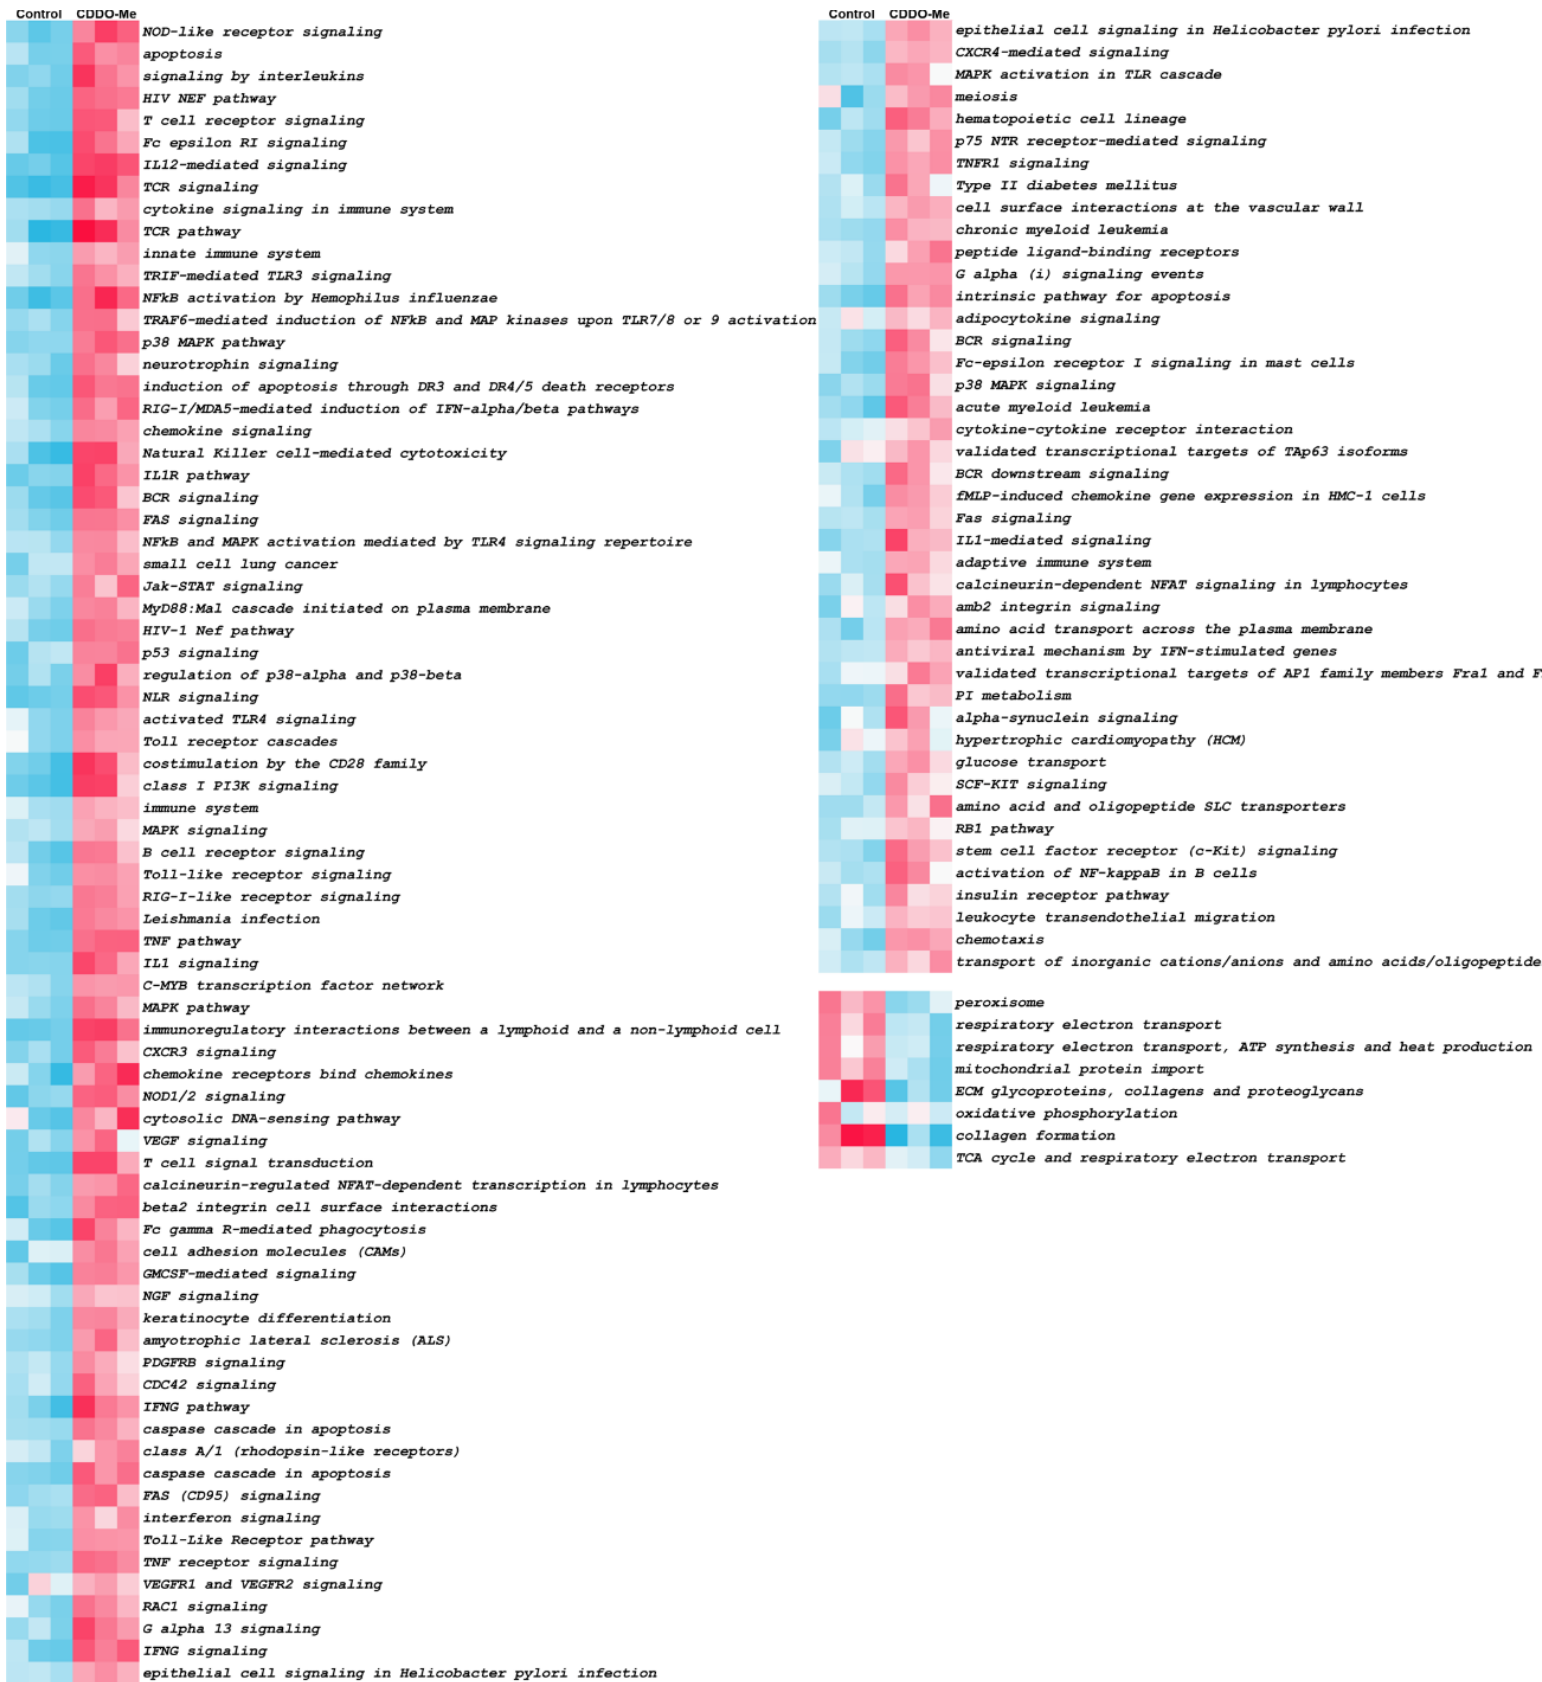

**Supplemental Figure S1. Canonical Pathway Analysis.** F4/80<sup>+</sup> TAMs were isolated from the mammary tissue of 12 week old mice that were fed with or without CDDO-Me in diet at 50 mg/kg for 8 weeks. Total RNA was isolated and analyzed by canonical pathway analysis of differentially expressed genes.

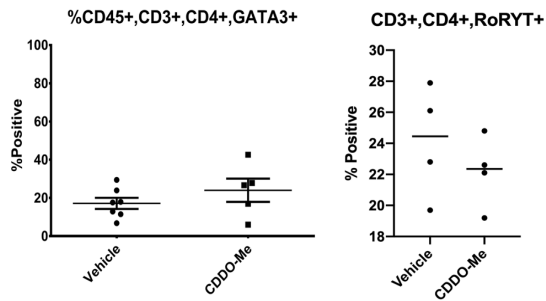

**Supplemental Figure S2.** *Tumor CD4<sup>+</sup> T cell subset analysis.* Whole mammary/tumor tissue of mice fed diet with or without 50 mg/kg CDDO-Me for 8 weeks was digested to a single cell suspension and analyzed by multicolor flow cytometry for analysis of CD4<sup>+</sup>T cell populations. Dual positive CD4/GATA3 and CD4/ROR $\gamma$  cell percentages were compared in control and CDDO-Me-treated mice. Expression of surface markers is represented as percentage of cells positive for the respective marker ( $n = 5-10$  per group). No significant differences in subsets were observed.

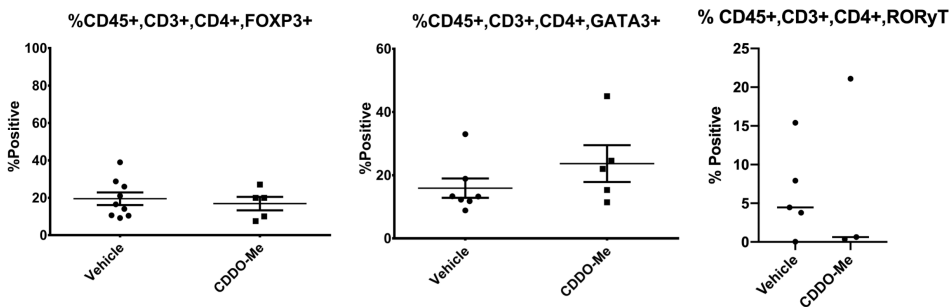

**Supplemental Figure S3.** *Splenic CD4<sup>+</sup> T cell subset analysis.* Whole mammary/tumor tissue of mice fed diet with or without 50 mg/kg CDDO-Me for 8 weeks was digested to a single cell suspension and analyzed by multicolor flow cytometry for analysis of CD4<sup>+</sup>T cell populations. Dual positive CD4/FOXP3, CD4/GATA3, and CD4/ROR $\gamma$  cell percentages were compared in control and CDDO-Me-treated mice. Expression of surface markers is represented as percentage of cells positive for the respective marker ( $n = 5-10$  per group). No significant differences in subsets were observed.

Supplemental Table S1

Genes with increased expression (FDR &lt; 5%) in control samples in Figure 2A as determined using Significance Analysis of Microarrays (SAM)

| FDR q-value (%) | Gene symbol   | Gene name                                                                                       |
|-----------------|---------------|-------------------------------------------------------------------------------------------------|
| 0               | Tmed3         | transmembrane emp24 domain containing 3                                                         |
| 0               | 1700012g19Rik | RIKEN cDNA 1700012G19 gene                                                                      |
| 0               | Mb            | myoglobin                                                                                       |
| 0               | Clec3b        | C-type lectin domain family 3, member b                                                         |
| 0               | Myh8          | myosin, heavy polypeptide 8, skeletal muscle, perinatal                                         |
| 0               | Map1lc3a      | microtubule-associated protein 1 light chain 3 alpha                                            |
| 0               | MGI:891976    | muscle, intestine and stomach expression 1                                                      |
| 0               | P4ha2         | procollagen-proline, 2-oxoglutarate 4-dioxygenase (proline 4-hydroxylase), alpha II polypeptide |
| 0               | Klk11         | kallikrein 11                                                                                   |
| 0               | Arhgdig       | Rho GDP dissociation inhibitor (GDI) gamma                                                      |
| 0               | Jagn1         | jagunal homolog 1 (Drosophila)                                                                  |
| 0               | D11ertd498e   | DNA segment, Chr 11, ERATO Doi 498, expressed                                                   |
| 0               | Hist1h1c      | histone 1, H1c                                                                                  |
| 0.545795608     | MGI:2153084   | serologically defined colon cancer antigen 33 like                                              |
| 0.545795608     | MGI:1351330   | cocaine and amphetamine regulated transcript                                                    |
| 0.545795608     | Fntb          | farnesyltransferase, CAAX box, beta                                                             |
| 0.545795608     | MGI:104966    | brain and kidney protein                                                                        |
| 0.545795608     | A030007d23Rik | RIKEN cDNA A030007D23 gene                                                                      |
| 0.545795608     | 4930506113Rik | RIKEN cDNA 4930506L13 gene                                                                      |
| 0.545795608     | Tmem41b       | transmembrane protein 41B                                                                       |
| 0.545795608     | Loxl2         | lysyl oxidase-like 2                                                                            |
| 0.545795608     | Actn3         | actinin alpha 3                                                                                 |
| 0.545795608     | Wnt4          | wingless-related MMTV integration site 4                                                        |
| 0.545795608     | Myoz1         | myozenin 1                                                                                      |
| 0.545795608     | Ick           | intestinal cell kinase                                                                          |
| 0.545795608     | Nr2f6         | nuclear receptor subfamily 2, group F, member 6                                                 |
| 0.545795608     | Egf           | epidermal growth factor                                                                         |
| 0.545795608     | Ppm1j         | protein phosphatase 1J                                                                          |
| 0.545795608     | Snrpn         | small nuclear ribonucleoprotein N                                                               |
| 0.735307972     | 4732486j07Rik | RIKEN cDNA 4732486J07 gene                                                                      |
| 0.735307972     | Rab17         | RAB17, member RAS oncogene family                                                               |
| 0.735307972     | Ubox5         | U box domain containing 5                                                                       |
| 0.735307972     | Smug1         | single-strand selective monofunctional uracil DNA glycosylase                                   |
| 0.735307972     | Ppp1r3c       | protein phosphatase 1, regulatory (inhibitor) subunit 3C                                        |
| 0.735307972     | Capn5         | calpain 5                                                                                       |
| 0.735307972     | Kcnk1         | potassium channel, subfamily K, member 1                                                        |
| 0.860848358     | Ckm           | creatine kinase, muscle                                                                         |
| 0.860848358     | C1qtnf4       | C1q and tumor necrosis factor related protein 4                                                 |
| 0.860848358     | B3gnt6        | UDP-GlcNAc:betaGal beta-1,3-N-acetylglucosaminyltransferase 6                                   |
| 0.860848358     | Exosc4        | exosome component 4                                                                             |
| 0.860848358     | Cited4        | Cbp/p300-interacting transactivator, with Glu/Asp-rich carboxy-terminal domain, 4               |
| 0.860848358     | Syngr1        | synaptogyrin 1                                                                                  |
| 0.860848358     | B930093c12Rik | RIKEN cDNA B930093C12 gene                                                                      |
| 0.860848358     | 2700038n03Rik | RIKEN cDNA 2700038N03 gene                                                                      |
| 0.860848358     | Copz2         | coatamer protein complex, subunit zeta 2                                                        |
| 0.860848358     | Narg1l        | NMDA receptor regulated 1-like                                                                  |
| 0.860848358     | Cd248         | CD248 antigen, endosialin                                                                       |
| 1.011633898     | 2310016a09Rik | RIKEN cDNA 2310016A09 gene                                                                      |
| 1.011633898     | Pthr1         | parathyroid hormone receptor 1                                                                  |
| 1.011633898     | Ogn           | osteoglycin                                                                                     |
| 1.011633898     | Klc3          | kinesin light chain 3                                                                           |
| 1.011633898     | MGI:2674071   | protein containing single MORN motif in testis                                                  |
| 1.011633898     | Zswim1        | zinc finger, SWIM domain containing 1                                                           |
| 1.011633898     | Rtn2          | reticulon 2 (Z-band associated protein)                                                         |
| 1.011633898     | Thop1         | thimet oligopeptidase 1                                                                         |
| 1.011633898     | Aldh1a7       | aldehyde dehydrogenase family 1, subfamily A7                                                   |
| 1.011633898     | 1700025k23Rik | RIKEN cDNA 1700025K23 gene                                                                      |
| 1.011633898     | Mgst3         | microsomal glutathione S-transferase 3                                                          |
| 1.011633898     | Kdelr3        | KDEL (Lys-Asp-Glu-Leu) endoplasmic reticulum protein retention receptor 3                       |
| 1.011633898     | Wfs1          | Wolfram syndrome 1 homolog (human)                                                              |
| 1.011633898     | Wisp2         | WNT1 inducible signaling pathway protein 2                                                      |
| 1.011633898     | Cyhr1         | cysteine and histidine rich 1                                                                   |
| 1.011633898     | Islr          | immunoglobulin superfamily containing leucine-rich repeat                                       |
| 1.011633898     | Fos           | FBJ osteosarcoma oncogene                                                                       |
| 1.157205989     | 9330140g23    | hypothetical protein 9330140G23                                                                 |
| 1.157205989     | Gprc5b        | G protein-coupled receptor, family C, group 5, member B                                         |
| 1.157205989     | Pet112l       | PET112-like (yeast)                                                                             |
| 1.157205989     | Spa17         | sperm autoantigenic protein 17                                                                  |
| 1.157205989     | Smo           | smoothened homolog (Drosophila)                                                                 |
| 1.157205989     | 1700065o13Rik | RIKEN cDNA 1700065O13 gene                                                                      |
| 1.157205989     | Zfp637        | zinc finger protein 637                                                                         |
| 1.157205989     | 5430428g01Rik | RIKEN cDNA 5430428G01 gene                                                                      |
| 1.157205989     | Fbxw8         | F-box and WD-40 domain protein 8                                                                |
| 1.157205989     | 3010021m21Rik | RIKEN cDNA 3010021M21 gene                                                                      |
| 1.157205989     | Serpine2      | serine (or cysteine) proteinase inhibitor, clade E, member 2                                    |
| 1.157205989     | Rab3d         | RAB3D, member RAS oncogene family                                                               |
| 1.157205989     | 2810432l12Rik | RIKEN cDNA 2810432L12 gene                                                                      |
| 1.157205989     | 0710008k08Rik | RIKEN cDNA 0710008K08 gene                                                                      |
| 1.157205989     | 1700027n10Rik | RIKEN cDNA 1700027N10 gene                                                                      |
| 1.157205989     | Pxmp4         | peroxisomal membrane protein 4                                                                  |
| 1.242774037     | Psmd5         | proteasome (prosome, macropain) 26S subunit, non-ATPase, 5                                      |
| 1.242774037     | Irs1          | insulin receptor substrate 1                                                                    |
| 1.242774037     | 1700088e04Rik | RIKEN cDNA 1700088E04 gene                                                                      |
| 1.242774037     | Cops7a        | COP9 (constitutive photomorphogenic) homolog, subunit 7a (Arabidopsis thaliana)                 |
| 1.242774037     | Coq4          | coenzyme Q4 homolog (yeast)                                                                     |

|             |               |                                                                                           |
|-------------|---------------|-------------------------------------------------------------------------------------------|
| 1.242774037 | Fgf10         | fibroblast growth factor 10                                                               |
| 1.242774037 | 2810417j12Rik | RIKEN cDNA 2810417J12 gene                                                                |
| 1.242774037 | Ddx1          | DEAD (Asp-Glu-Ala-Asp) box polypeptide 1                                                  |
| 1.242774037 | Oact1         | O-acyltransferase (membrane bound) domain containing 1                                    |
| 1.242774037 | Btc           | betacellulin, epidermal growth factor family member                                       |
| 1.242774037 | 4931406o17Rik | RIKEN cDNA 4931406O17 gene                                                                |
| 1.242774037 | Zdhhc2        | zinc finger, DHHC domain containing 2                                                     |
| 1.242774037 | Myoc          | myocilin                                                                                  |
| 1.242774037 | Ai467484      | expressed sequence AI467484                                                               |
| 1.242774037 | Serpinf1      | serine (or cysteine) proteinase inhibitor, clade F, member 1                              |
| 1.242774037 | Crtap         | cartilage associated protein                                                              |
| 1.242774037 | Gna11         | guanine nucleotide binding protein, alpha 11                                              |
| 1.242774037 | Sirt5         | sirtuin 5 (silent mating type information regulation 2 homolog) 5 (S. cerevisiae)         |
| 1.242774037 | Rab2          | RAB2, member RAS oncogene family                                                          |
| 1.242774037 | Zfp41         | zinc finger protein 41                                                                    |
| 1.242774037 | Rpn1          | ribophorin 1                                                                              |
| 1.242774037 | Cd164         | CD164 antigen                                                                             |
| 1.242774037 | D9ertd280e    | DNA segment, Chr 9, ERATO Doi 280, expressed                                              |
| 1.242774037 | Pde9a         | phosphodiesterase 9A                                                                      |
| 1.242774037 | Tde2l         | tumor differentially expressed 2-like                                                     |
| 1.242774037 | Mamdc2        | MAM domain containing 2                                                                   |
| 1.242774037 | Zfp35         | zinc finger protein 35                                                                    |
| 1.242774037 | Asb8          | ankyrin repeat and SOCS box-containing protein 8                                          |
| 1.242774037 | Tmem9         | transmembrane protein 9                                                                   |
| 1.242774037 | Kdelc2        | KDEL (Lys-Asp-Glu-Leu) containing 2                                                       |
| 1.242774037 | Pccb          | propionyl Coenzyme A carboxylase, beta polypeptide                                        |
| 1.242774037 | Ggt1          | gamma-glutamyltransferase 1                                                               |
| 1.242774037 | Plekhf1       | pleckstrin homology domain containing, family F (with FYVE domain) member 1               |
| 1.242774037 | Mgc102251     | similar to regulator of sex-limitation candidate 11                                       |
| 1.242774037 | Tmem15        | transmembrane protein 15                                                                  |
| 1.242774037 | 4933412h03Rik | RIKEN cDNA 4933412H03 gene                                                                |
| 1.242774037 | Kcnn4         | potassium intermediate/small conductance calcium-activated channel, subfamily N, member 4 |
| 1.298581626 | Hspa12b       | heat shock protein 12B                                                                    |
| 1.298581626 | Myl1          | myosin, light polypeptide 1                                                               |
| 1.298581626 | Cox6a2        | cytochrome c oxidase, subunit VI a, polypeptide 2                                         |
| 1.298581626 | MGI:3028594   | zinc finger protein 422, related sequence 1                                               |
| 1.298581626 | Stard10       | START domain containing 10                                                                |
| 1.298581626 | Ai646023      | expressed sequence AI646023                                                               |
| 1.298581626 | Cyp2b9        | cytochrome P450, family 2, subfamily b, polypeptide 9                                     |
| 1.298581626 | Aw209491      | expressed sequence AW209491                                                               |
| 1.298581626 | 4632408a20Rik | RIKEN cDNA 4632408A20 gene                                                                |
| 1.298581626 | 0610011f06Rik | RIKEN cDNA 0610011F06 gene                                                                |
| 1.298581626 | Gm237         | gene model 237, (NCBI)                                                                    |
| 1.298581626 | Bc029169      | cDNA sequence BC029169                                                                    |
| 1.298581626 | Gabrd         | gamma-aminobutyric acid (GABA-A) receptor, subunit delta                                  |
| 1.298581626 | 2400009b11Rik | RIKEN cDNA 2400009B11 gene                                                                |
| 1.298581626 | Coq7          | demethyl-Q7                                                                               |
| 1.298581626 | Pkia          | protein kinase inhibitor, alpha                                                           |
| 1.298581626 | 1700022c21Rik | RIKEN cDNA 1700022C21 gene                                                                |
| 1.298581626 | Map3k7ip1     | mitogen-activated protein kinase kinase 7 interacting protein 1                           |
| 1.298581626 | Ntn1          | netrin 1                                                                                  |
| 1.298581626 | 6330416i07Rik | RIKEN cDNA 6330416I07 gene                                                                |
| 1.298581626 | Egln3         | EGL nine homolog 3 (C. elegans)                                                           |
| 1.298581626 | Tmem4         | transmembrane protein 4                                                                   |
| 1.298581626 | Slc35f3       | solute carrier family 35, member F3                                                       |
| 1.298581626 | Ntf5          | neurotrophin 5                                                                            |
| 1.298581626 | Apoa1bp       | apolipoprotein A-I binding protein                                                        |
| 1.298581626 | Efs           | embryonal Fyn-associated substrate                                                        |
| 1.298581626 | 2810430m08Rik | RIKEN cDNA 2810430M08 gene                                                                |
| 1.298581626 | Cdv1          | carnitine deficiency-associated gene expressed in ventricle 1                             |
| 1.298581626 | Bpgm          | 2,3-bisphosphoglycerate mutase                                                            |
| 1.298581626 | 1110038f14Rik | RIKEN cDNA 1110038F14 gene                                                                |
| 1.298581626 | 5730449i18Rik | RIKEN cDNA 5730449I18 gene                                                                |
| 1.298581626 | Bc055368      | cDNA sequence BC055368                                                                    |
| 1.557122764 | Bc025546      | cDNA sequence BC025546                                                                    |
| 1.557122764 | 4930430j20Rik | RIKEN cDNA 4930430J20 gene                                                                |
| 1.557122764 | Lman1         | lectin, mannose-binding, 1                                                                |
| 1.557122764 | Trp63         | transformation related protein 63                                                         |
| 1.557122764 | 4930467b06Rik | RIKEN cDNA 4930467B06 gene                                                                |
| 1.557122764 | Thra          | thyroid hormone receptor alpha                                                            |
| 1.557122764 | Grtp1         | GH regulated TBC protein 1                                                                |
| 1.557122764 | 1700019d03Rik | RIKEN cDNA 1700019D03 gene                                                                |
| 1.557122764 | Mrps31        | mitochondrial ribosomal protein S31                                                       |
| 1.557122764 | 1300017k07Rik | RIKEN cDNA 1300017K07 gene                                                                |
| 1.557122764 | Abcd3         | ATP-binding cassette, sub-family D (ALD), member 3                                        |
| 1.557122764 | Jrk           | jerky                                                                                     |
| 1.557122764 | 4930506d23Rik | RIKEN cDNA 4930506D23 gene                                                                |
| 1.557122764 | Tst           | thiosulfate sulfurtransferase, mitochondrial                                              |
| 1.557122764 | Stc2          | stanniocalcin 2                                                                           |
| 1.557122764 | Itga11        | integrin, alpha 11                                                                        |
| 1.557122764 | Tbl2          | transducin (beta)-like 2                                                                  |
| 1.557122764 | 4933424n09Rik | RIKEN cDNA 4933424N09 gene                                                                |
| 1.557122764 | Decr2         | 2-4-dienoyl-Coenzyme A reductase 2, peroxisomal                                           |
| 1.557122764 | 1110025i09Rik | RIKEN cDNA 1110025I09 gene                                                                |
| 1.557122764 | Esr1          | estrogen receptor 1 (alpha)                                                               |
| 1.557122764 | Gstm5         | glutathione S-transferase, mu 5                                                           |
| 1.557122764 | Ranbp6        | RAN binding protein 6                                                                     |

|             |               |                                                                                             |
|-------------|---------------|---------------------------------------------------------------------------------------------|
| 1.557122764 | Txndc2        | thioredoxin domain containing 2 (spermatzoa)                                                |
| 1.557122764 | Tpd52l1       | tumor protein D52-like 1                                                                    |
| 1.557122764 | Ndufb9        | NADH dehydrogenase (ubiquinone) 1 beta subcomplex, 9                                        |
| 1.557122764 | Timm17a       | translocator of inner mitochondrial membrane 17a                                            |
| 1.557122764 | Thap4         | THAP domain containing 4                                                                    |
| 1.557122764 | Trim68        | tripartite motif containing 68                                                              |
| 1.557122764 | 2410081m15Rik | RIKEN cDNA 2410081M15 gene                                                                  |
| 1.557122764 | 2310020a21Rik | RIKEN cDNA 2310020A21 gene                                                                  |
| 1.557122764 | Usp46         | ubiquitin specific protease 46                                                              |
| 1.557122764 | C1qtnf3       | C1q and tumor necrosis factor related protein 3                                             |
| 1.557122764 | Tmcc2         | transmembrane and coiled-coil domains 2                                                     |
| 1.557122764 | Bmpr1a        | bone morphogenetic protein receptor, type 1A                                                |
| 1.557122764 | 1700021f05Rik | RIKEN cDNA 1700021F05 gene                                                                  |
| 1.557122764 | Adams2        | a disintegrin-like and metalloprotease (repolysin type) with thrombospondin type 1 motif, 2 |
| 1.557122764 | Hyal2         | hyaluronidase 2                                                                             |
| 1.557122764 | Apln          | apelin                                                                                      |
| 1.557122764 | Bc021608      | cDNA sequence BC021608                                                                      |
| 1.557122764 | Tgfb3         | transforming growth factor, beta 3                                                          |
| 1.557122764 | Qtrt1         | queuine tRNA-ribosyltransferase 1                                                           |
| 1.557122764 | Grem2         | gremlin 2 homolog, cysteine knot superfamily (Xenopus laevis)                               |
| 1.557122764 | Pcolce2       | procollagen C-endopeptidase enhancer 2                                                      |
| 1.557122764 | Col3a1        | procollagen, type III, alpha 1                                                              |
| 1.557122764 | Dpt           | dermatopontin                                                                               |
| 1.557122764 | Slc38a3       | solute carrier family 38, member 3                                                          |
| 1.626714843 | Myohd1        | myosin head domain containing 1                                                             |
| 1.626714843 | 4931419k03Rik | RIKEN cDNA 4931419K03 gene                                                                  |
| 1.626714843 | 1500032d16Rik | RIKEN cDNA 1500032D16 gene                                                                  |
| 1.626714843 | Cd99l2        | Cd99 antigen-like 2                                                                         |
| 1.626714843 | S100a14       | S100 calcium binding protein A14                                                            |
| 1.626714843 | Ndufab1       | NADH dehydrogenase (ubiquinone) 1, alpha/beta subcomplex, 1                                 |
| 1.626714843 | Efemp2        | epidermal growth factor-containing fibulin-like extracellular matrix protein 2              |
| 1.626714843 | Cnih          | cornichon homolog (Drosophila)                                                              |
| 1.626714843 | Smpd1         | sphingomyelin phosphodiesterase 1, acid lysosomal                                           |
| 1.626714843 | Sfxn1         | sideroflexin 1                                                                              |
| 1.626714843 | Tsen2         | tRNA splicing endonuclease 2 homolog (SEN2, S. cerevisiae)                                  |
| 1.626714843 | 0610009o20Rik | RIKEN cDNA 0610009O20 gene                                                                  |
| 1.626714843 | Prdx3         | peroxiredoxin 3                                                                             |
| 1.626714843 | 2010107g23Rik | RIKEN cDNA 2010107G23 gene                                                                  |
| 1.626714843 | 1110004b13Rik | RIKEN cDNA 1110004B13 gene                                                                  |
| 1.626714843 | Nek7          | NIMA (never in mitosis gene a)-related expressed kinase 7                                   |
| 1.626714843 | Scyl3         | SCY1-like 3 (S. cerevisiae)                                                                 |
| 1.626714843 | MGI:1925867   | CSA-conditional, T cell activation-dependent protein                                        |
| 1.626714843 | 9330196j05Rik | RIKEN cDNA 9330196J05 gene                                                                  |
| 1.626714843 | 1810021j13Rik | RIKEN cDNA 1810021J13 gene                                                                  |
| 1.626714843 | 6230427j02Rik | RIKEN cDNA 6230427J02 gene                                                                  |
| 1.626714843 | Clec11a       | C-type lectin domain family 11, member a                                                    |
| 1.626714843 | Agtr1         | angiotensin receptor 1                                                                      |
| 1.626714843 | Dhrs7         | dehydrogenase/reductase (SDR family) member 7                                               |
| 1.626714843 | Sfxn4         | sideroflexin 4                                                                              |
| 1.626714843 | 2010003o18Rik | RIKEN cDNA 2010003O18 gene                                                                  |
| 1.626714843 | 0610040b21Rik | RIKEN cDNA 0610040B21 gene                                                                  |
| 1.626714843 | 6430520m22Rik | RIKEN cDNA 6430520M22 gene                                                                  |
| 1.626714843 | 2010011i20Rik | RIKEN cDNA 2010011I20 gene                                                                  |
| 1.626714843 | Ai604832      | expressed sequence AI604832                                                                 |
| 1.626714843 | Grb7          | growth factor receptor bound protein 7                                                      |
| 1.626714843 | Anapc4        | anaphase promoting complex subunit 4                                                        |
| 1.626714843 | Zfp322a       | zinc finger protein 322a                                                                    |
| 1.626714843 | Scd1          | stearoyl-Coenzyme A desaturase 1                                                            |
| 1.626714843 | 2610318k02Rik | RIKEN cDNA 2610318K02 gene                                                                  |
| 1.626714843 | Iqcc          | IQ motif containing C                                                                       |
| 1.626714843 | Tmem17        | transmembrane protein 17                                                                    |
| 1.626714843 | Acad9         | acyl-Coenzyme A dehydrogenase family, member 9                                              |
| 1.626714843 | Mrpl36        | mitochondrial ribosomal protein L36                                                         |
| 1.626714843 | Timp4         | tissue inhibitor of metalloproteinase 4                                                     |
| 1.626714843 | Nif3l1        | Ngg1 interacting factor 3-like 1 (S. pombe)                                                 |
| 1.626714843 | 3110043j09Rik | RIKEN cDNA 3110043J09 gene                                                                  |
| 1.626714843 | Epha7         | Eph receptor A7                                                                             |
| 1.626714843 | Zdhhc12       | zinc finger, DHHC domain containing 12                                                      |
| 1.626714843 | Tirap         | toll-interleukin 1 receptor (TIR) domain-containing adaptor protein                         |
| 1.626714843 | Fcmd          | Fukuyama type congenital muscular dystrophy homolog (human)                                 |
| 1.626714843 | Bc027828      | cDNA sequence BC027828                                                                      |
| 1.626714843 | Dnalc4        | dynein, axonemal, light chain 4                                                             |
| 1.626714843 | Ly6a          | lymphocyte antigen 6 complex, locus A                                                       |
| 1.626714843 | Wdr45         | WD repeat domain 45                                                                         |
| 1.626714843 | Tmed5         | transmembrane emp24 protein transport domain containing 5                                   |
| 1.626714843 | Znf23         | zinc finger protein 23 (KOX 16)                                                             |
| 1.626714843 | Pttg1ip       | pituitary tumor-transforming 1 interacting protein                                          |
| 1.626714843 | Trim29        | tripartite motif protein 29                                                                 |
| 1.626714843 | C630013n10Rik | RIKEN cDNA C630013N10 gene                                                                  |
| 1.626714843 | Fzd1          | frizzled homolog 1 (Drosophila)                                                             |
| 1.895021888 | Aldh6a1       | aldehyde dehydrogenase family 6, subfamily A1                                               |
| 1.895021888 | Rohn          | ras homolog gene family, member N                                                           |
| 1.895021888 | Ai842396      | expressed sequence AI842396                                                                 |
| 1.895021888 | Ndn           | neclin                                                                                      |
| 1.895021888 | Ndufa4        | NADH dehydrogenase (ubiquinone) 1 alpha subcomplex, 4                                       |
| 1.895021888 | Rab14         | RAB, member of RAS oncogene family-like 4                                                   |
| 1.895021888 | Mr1           | major histocompatibility complex, class I-related                                           |

|             |               |                                                                                             |
|-------------|---------------|---------------------------------------------------------------------------------------------|
| 1.895021888 | Gemin4        | gem (nuclear organelle) associated protein 4                                                |
| 1.895021888 | Tnnt3         | troponin T3, skeletal, fast                                                                 |
| 1.895021888 | C2            | complement component 2 (within H-25)                                                        |
| 1.895021888 | Rfk           | riboflavin kinase                                                                           |
| 1.895021888 | Extl1         | exostosins (multiple)-like 1                                                                |
| 1.895021888 | Cd36          | CD36 antigen                                                                                |
| 1.895021888 | 6030490i01Rik | RIKEN cDNA 6030490i01 gene                                                                  |
| 1.895021888 | 1200009f10Rik | RIKEN cDNA 1200009F10 gene                                                                  |
| 1.895021888 | Fbn1          | fibrillin 1                                                                                 |
| 1.895021888 | C78409        | expressed sequence C78409                                                                   |
| 1.895021888 | Paqr6         | progesterin and adipoQ receptor family member VI                                            |
| 1.895021888 | 4932411a10Rik | RIKEN cDNA 4932411A10 gene                                                                  |
| 1.895021888 | Ai662250      | expressed sequence AI662250                                                                 |
| 1.895021888 | Abcb6         | ATP-binding cassette, sub-family B (MDR/TAP), member 6                                      |
| 1.895021888 | Plscr3        | phospholipid scramblase 3                                                                   |
| 1.895021888 | Bckdk         | branched chain ketoacid dehydrogenase kinase                                                |
| 1.895021888 | Trim23        | tripartite motif protein 23                                                                 |
| 1.895021888 | Perp          | PERP, TP53 apoptosis effector                                                               |
| 1.895021888 | MGI:1920480   | BMP-binding endothelial regulator                                                           |
| 1.895021888 | 1110058l19Rik | RIKEN cDNA 1110058L19 gene                                                                  |
| 1.895021888 | Cbx2          | chromobox homolog 2 (Drosophila Pc class)                                                   |
| 1.895021888 | Pros1         | protein S (alpha)                                                                           |
| 1.895021888 | Lamb2         | laminin, beta 2                                                                             |
| 1.895021888 | Pex11a        | peroxisomal biogenesis factor 11a                                                           |
| 1.895021888 | Lxn           | latexin                                                                                     |
| 1.895021888 | Zfp426        | zinc finger protein 426                                                                     |
| 1.895021888 | Tcfap2c       | transcription factor AP-2, gamma                                                            |
| 1.895021888 | 4933425f03Rik | RIKEN cDNA 4933425F03 gene                                                                  |
| 1.895021888 | Wbscr16       | Williams-Beuren syndrome chromosome region 16 homolog (human)                               |
| 1.895021888 | Dci           | dodecenoyl-Coenzyme A delta isomerase (3,2 trans-enoyl-Coenzyme A isomerase)                |
| 1.895021888 | D12ertd647e   | DNA segment, Chr 12, ERATO Doi 647, expressed                                               |
| 1.895021888 | 4930577m16Rik | RIKEN cDNA 4930577M16 gene                                                                  |
| 1.895021888 | Cdw92         | CDW92 antigen                                                                               |
| 1.895021888 | Cd151         | CD151 antigen                                                                               |
| 1.895021888 | Scrg1         | scrapie responsive gene 1                                                                   |
| 1.895021888 | Cplx2         | complexin 2                                                                                 |
| 1.895021888 | 2410005o16Rik | RIKEN cDNA 2410005O16 gene                                                                  |
| 1.895021888 | Slc25a29      | solute carrier family 25 (mitochondrial carrier, palmitoylcarnitine transporter), member 29 |
| 1.895021888 | Rnmtl1        | RNA methyltransferase like 1                                                                |
| 1.895021888 | Cog8          | component of oligomeric golgi complex 8                                                     |
| 1.895021888 | Plk2          | polo-like kinase 2 (Drosophila)                                                             |
| 1.895021888 | Spcs1         | signal peptidase complex subunit 1 homolog (S. cerevisiae)                                  |
| 1.895021888 | 4430402i18Rik | RIKEN cDNA 4430402I18 gene                                                                  |
| 1.895021888 | Cab39l        | calcium binding protein 39-like                                                             |
| 1.895021888 | Slc25a17      | solute carrier family 25 (mitochondrial carrier, peroxisomal membrane protein), member 17   |
| 1.895021888 | Fbp1          | fructose biphosphatase 1                                                                    |
| 1.895021888 | 2610311i19Rik | RIKEN cDNA 2610311I19 gene                                                                  |
| 1.895021888 | Hdhd3         | haloacid dehalogenase-like hydrolase domain containing 3                                    |
| 1.895021888 | Cdc16         | CDC16 cell division cycle 16 homolog (S. cerevisiae)                                        |
| 1.895021888 | Aw146020      | expressed sequence AW146020                                                                 |
| 1.895021888 | Rhoc          | ras homolog gene family, member C                                                           |
| 1.895021888 | Mmp2          | matrix metalloproteinase 2                                                                  |
| 1.895021888 | Rdh14         | retinol dehydrogenase 14 (all-trans and 9-cis)                                              |
| 1.895021888 | Jub           | ajuba                                                                                       |
| 1.895021888 | Clpb          | ClpB caseinolytic peptidase B homolog (E. coli)                                             |
| 1.895021888 | Parp16        | poly (ADP-ribose) polymerase family, member 16                                              |
| 1.895021888 | Fabp9         | fatty acid binding protein 9, testis                                                        |
| 1.895021888 | Ltbp3         | latent transforming growth factor beta binding protein 3                                    |
| 1.895021888 | 1810033a06Rik | RIKEN cDNA 1810033A06 gene                                                                  |
| 1.895021888 | Sema3c        | sema domain, immunoglobulin domain (Ig), short basic domain, secreted, (semaphorin) 3C      |
| 1.895021888 | 2610205e22Rik | RIKEN cDNA 2610205E22 gene                                                                  |
| 1.895021888 | Adcyap1r1     | adenylate cyclase activating polypeptide 1 receptor 1                                       |
| 1.895021888 | Mrps17        | mitochondrial ribosomal protein S17                                                         |
| 1.895021888 | Zdhhc16       | zinc finger, DHHC domain containing 16                                                      |
| 1.895021888 | D11ertd730e   | DNA segment, Chr 11, ERATO Doi 730, expressed                                               |
| 1.895021888 | 1600012h06Rik | RIKEN cDNA 1600012H06 gene                                                                  |
| 1.895021888 | 0610012d09Rik | RIKEN cDNA 0610012D09 gene                                                                  |
| 1.895021888 | MGI:1921571   | timeless interacting protein                                                                |
| 1.895021888 | Dok4          | docking protein 4                                                                           |
| 1.895021888 | 2610044o15Rik | RIKEN cDNA 2610044O15 gene                                                                  |
| 2.021069957 | Nfatc4        | nuclear factor of activated T-cells, cytoplasmic, calcineurin-dependent 4                   |
| 2.021069957 | 2210021j22Rik | RIKEN cDNA 2210021J22 gene                                                                  |
| 2.021069957 | Dph2          | DPH2 homolog (S. cerevisiae)                                                                |
| 2.021069957 | Asah2         | N-acylsphingosine amidohydrolase 2                                                          |
| 2.021069957 | Aig1          | androgen-induced 1                                                                          |
| 2.021069957 | MGI:2385656   | lipidosin                                                                                   |
| 2.021069957 | A230106m15Rik | RIKEN cDNA A230106M15 gene                                                                  |
| 2.021069957 | Nr5a2         | nuclear receptor subfamily 5, group A, member 2                                             |
| 2.021069957 | Krt1-19       | keratin complex 1, acidic, gene 19                                                          |
| 2.021069957 | Atp5s         | ATP synthase, H+ transporting, mitochondrial F0 complex, subunit s                          |
| 2.021069957 | Tspan6        | tetraspanin 6                                                                               |
| 2.021069957 | Tle6          | transducin-like enhancer of split 6, homolog of Drosophila E(spl)                           |
| 2.021069957 | Col1a2        | procollagen, type I, alpha 2                                                                |
| 2.021069957 | Rnf103        | ring finger protein 103                                                                     |
| 2.021069957 | Zfp105        | zinc finger protein 105                                                                     |
| 2.021069957 | 2310039h08Rik | RIKEN cDNA 2310039H08 gene                                                                  |
| 2.021069957 | Loxl1         | lysyl oxidase-like 1                                                                        |

|             |               |                                                                                                             |
|-------------|---------------|-------------------------------------------------------------------------------------------------------------|
| 2.021069957 | Cav2          | caveolin 2                                                                                                  |
| 2.021069957 | Thtpa         | thiamine triphosphatase                                                                                     |
| 2.021069957 | 4632417n05Rik | RIKEN cDNA 4632417N05 gene                                                                                  |
| 2.021069957 | Col5a1        | procollagen, type V, alpha 1                                                                                |
| 2.021069957 | Eps8l2        | EPS8-like 2                                                                                                 |
| 2.021069957 | 2810432d09Rik | RIKEN cDNA 2810432D09 gene                                                                                  |
| 2.021069957 | Cecr5         | cat eye syndrome chromosome region, candidate 5 homolog (human)                                             |
| 2.021069957 | Tmem18        | transmembrane protein 18                                                                                    |
| 2.021069957 | Id4           | inhibitor of DNA binding 4                                                                                  |
| 2.021069957 | Rab13         | RAB, member of RAS oncogene family-like 3                                                                   |
| 2.021069957 | Wig1          | wild-type p53-induced gene 1                                                                                |
| 2.021069957 | Serf1a        | small EDRK-rich factor 1A (telomeric)                                                                       |
| 2.021069957 | Pbp           | phosphatidylethanolamine binding protein                                                                    |
| 2.021069957 | Osgepl1       | O-sialoglycoprotein endopeptidase-like 1                                                                    |
| 2.021069957 | Fgd1          | FYVE, RhoGEF and PH domain containing 1                                                                     |
| 2.021069957 | Dpagt1        | dolichyl-phosphate (UDP-N-acetylglucosamine) acetylglucosaminophosphotransferase 1 (GlcNAc-1-P transferase) |
| 2.021069957 | Timm22        | translocase of inner mitochondrial membrane 22 homolog (yeast)                                              |
| 2.021069957 | Fbxo31        | F-box only protein 31                                                                                       |
| 2.021069957 | Aa409316      | expressed sequence AA409316                                                                                 |
| 2.021069957 | Nr2c1         | nuclear receptor subfamily 2, group C, member 1                                                             |
| 2.021069957 | C76566        | expressed sequence C76566                                                                                   |
| 2.021069957 | Hebp2         | heme binding protein 2                                                                                      |
| 2.021069957 | Scrn3         | secernin 3                                                                                                  |
| 2.021069957 | MGI:1913996   | dynein 2 light intermediate chain                                                                           |
| 2.021069957 | Fcna          | ficolin A                                                                                                   |
| 2.021069957 | Prlr          | prolactin receptor                                                                                          |
| 2.021069957 | Cdo1          | cysteine dioxygenase 1, cytosolic                                                                           |
| 2.021069957 | Muc1          | mucin 1, transmembrane                                                                                      |
| 2.021069957 | Gja5          | gap junction membrane channel protein alpha 5                                                               |
| 2.021069957 | 1700018o18Rik | RIKEN cDNA 1700018O18 gene                                                                                  |
| 2.021069957 | 1810060d16Rik | RIKEN cDNA 1810060D16 gene                                                                                  |
| 2.021069957 | Zfyve20       | zinc finger, FYVE domain containing 20                                                                      |
| 2.021069957 | 1110059e24Rik | RIKEN cDNA 1110059E24 gene                                                                                  |
| 2.021069957 | 2210010b09Rik | RIKEN cDNA 2210010B09 gene                                                                                  |
| 2.021069957 | Aldh5a1       | aldehyde dehydrogenase family 5, subfamily A1                                                               |
| 2.021069957 | Ankmy2        | ankyrin repeat and MYND domain containing 2                                                                 |
| 2.021069957 | C1r           | complement component 1, r subcomponent                                                                      |
| 2.021069957 | 1810049h13Rik | RIKEN cDNA 1810049H13 gene                                                                                  |
| 2.021069957 | 4632433k11Rik | RIKEN cDNA 4632433K11 gene                                                                                  |
| 2.021069957 | 1810043g02Rik | RIKEN cDNA 1810043G02 gene                                                                                  |
| 2.021069957 | Cop9          | COP9 (constitutive photomorphogenic) homolog, subunit 5 (Arabidopsis thaliana)                              |
| 2.021069957 | Zfp39         | zinc finger protein 39                                                                                      |
| 2.021069957 | Bet1          | blocked early in transport 1 homolog (S. cerevisiae)                                                        |
| 2.021069957 | D8ertd812e    | DNA segment, Chr 8, ERATO Doi 812, expressed                                                                |
| 2.021069957 | Wtip          | WT1-interacting protein                                                                                     |
| 2.021069957 | Iitm2a        | integral membrane protein 2A                                                                                |
| 2.021069957 | Parn          | poly(A)-specific ribonuclease (deadenylation nuclease)                                                      |
| 2.021069957 | Bc026778      | cDNA sequence BC026778                                                                                      |
| 2.021069957 | B230317c12Rik | RIKEN cDNA B230317C12 gene                                                                                  |
| 2.021069957 | Tlr3          | toll-like receptor 3                                                                                        |
| 2.021069957 | Fmod          | fibromodulin                                                                                                |
| 2.021069957 | Fzd7          | frizzled homolog 7 (Drosophila)                                                                             |
| 2.021069957 | Osbp12        | oxysterol binding protein-like 2                                                                            |
| 2.021069957 | Nit1          | nitrilase 1                                                                                                 |
| 2.021069957 | Decr1         | 2,4-dienoyl CoA reductase 1, mitochondrial                                                                  |
| 2.021069957 | Bc052066      | cDNA sequence BC052066                                                                                      |
| 2.021069957 | 3110037i16Rik | RIKEN cDNA 3110037I16 gene                                                                                  |
| 2.021069957 | Ptk2          | PTK2 protein tyrosine kinase 2                                                                              |
| 2.021069957 | Nme3          | expressed in non-metastatic cells 3                                                                         |
| 2.021069957 | Smardc3       | SWI/SNF related, matrix associated, actin dependent regulator of chromatin, subfamily d, member 3           |
| 2.021069957 | Map1lc3b      | microtubule-associated protein 1 light chain 3 beta                                                         |
| 2.021069957 | Dmap1         | DNA methyltransferase 1-associated protein 1                                                                |
| 2.021069957 | Urod          | uroporphyrinogen decarboxylase                                                                              |
| 2.021069957 | Prrg2         | proline-rich Gla (G-carboxyglutamic acid) polypeptide 2                                                     |
| 2.021069957 | D10ertd610e   | DNA segment, Chr 10, ERATO Doi 610, expressed                                                               |
| 2.021069957 | Nol7          | nucleolar protein 7                                                                                         |
| 2.021069957 | D4bwg0951e    | DNA segment, Chr 4, Brigham & Women's Genetics 0951 expressed                                               |
| 2.021069957 | Ndufc1        | NADH dehydrogenase (ubiquinone) 1, subcomplex unknown, 1                                                    |
| 2.021069957 | Akr1b8        | aldo-keto reductase family 1, member B8                                                                     |
| 2.021069957 | Msrb2         | methionine sulfoxide reductase B2                                                                           |
| 2.021069957 | Abi2          | abl-interactor 2                                                                                            |
| 2.021069957 | Ai597479      | expressed sequence AI597479                                                                                 |
| 2.021069957 | Gstt3         | glutathione S-transferase, theta 3                                                                          |
| 2.021069957 | Col5a3        | procollagen, type V, alpha 3                                                                                |
| 2.021069957 | Pecr          | peroxisomal trans-2-enoyl-CoA reductase                                                                     |
| 2.188047709 | Egfr          | epidermal growth factor receptor                                                                            |
| 2.188047709 | Znhit2        | zinc finger, HIT domain containing 2                                                                        |
| 2.188047709 | Rarres2       | retinoic acid receptor responder (tazarotene induced) 2                                                     |
| 2.188047709 | Olfml2b       | olfactomedin-like 2B                                                                                        |
| 2.188047709 | 1810014f10Rik | RIKEN cDNA 1810014F10 gene                                                                                  |
| 2.188047709 | Ggcx          | gamma-glutamyl carboxylase                                                                                  |
| 2.188047709 | Bc016198      | cDNA sequence BC016198                                                                                      |
| 2.188047709 | 6530411b15Rik | RIKEN cDNA 6530411B15 gene                                                                                  |
| 2.188047709 | Galk1         | galactokinase 1                                                                                             |
| 2.188047709 | Bc006662      | cDNA sequence BC006662                                                                                      |
| 2.188047709 | Nipa1         | non imprinted in Prader-Willi/Angelman syndrome 1 homolog (human)                                           |
| 2.188047709 | A230050p20Rik | RIKEN cDNA A230050P20 gene                                                                                  |



|             |               |                                                                                             |
|-------------|---------------|---------------------------------------------------------------------------------------------|
| 2.188047709 | Cldn10        | claudin 10                                                                                  |
| 2.188047709 | 4432406c05Rik | RIKEN cDNA 4432406C05 gene                                                                  |
| 2.188047709 | Biklk         | Bcl2-interacting killer-like                                                                |
| 2.188047709 | Tparl         | TPA regulated locus                                                                         |
| 2.188047709 | 1700039d13Rik | RIKEN cDNA 1700039D13 gene                                                                  |
| 2.188047709 | Bag4          | BCL2-associated athanogene 4                                                                |
| 2.188047709 | 9330164h19Rik | RIKEN cDNA 9330164H19 gene                                                                  |
| 2.188047709 | Acy3          | aspartoacylase (aminoacylase) 3                                                             |
| 2.188047709 | Serpina3n     | serine (or cysteine) proteinase inhibitor, clade A, member 3N                               |
| 2.188047709 | Slc25a4       | solute carrier family 25 (mitochondrial carrier, adenine nucleotide translocator), member 4 |
| 2.188047709 | Hrsp12        | heat-responsive protein 12                                                                  |
| 2.188047709 | Rcn1          | reticulocalbin 1                                                                            |
| 2.188047709 | Nme7          | non-metastatic cells 7, protein expressed in                                                |
| 2.188047709 | Chchd1        | coiled-coil-helix-coiled-coil-helix domain containing 1                                     |
| 2.188047709 | Aass          | aminoadipate-semialdehyde synthase                                                          |
| 2.188047709 | Aw742319      | expressed sequence AW742319                                                                 |
| 2.188047709 | Ednrb         | endothelin receptor type B                                                                  |
| 2.188047709 | Cpt1c         | carnitine palmitoyltransferase 1c                                                           |
| 2.188047709 | Pex11c        | peroxisomal biogenesis factor 11c                                                           |
| 2.188047709 | 5031439a09Rik | RIKEN cDNA 5031439A09 gene                                                                  |
| 2.188047709 | Agtrl1        | angiotensin receptor-like 1                                                                 |
| 2.188047709 | Elovl7        | ELOVL family member 7, elongation of long chain fatty acids (yeast)                         |
| 2.188047709 | Ccl24         | chemokine (C-C motif) ligand 24                                                             |
| 2.188047709 | 0610006i08Rik | RIKEN cDNA 0610006I08 gene                                                                  |
| 2.188047709 | Tmeff2        | transmembrane protein with EGF-like and two follistatin-like domains 2                      |
| 2.188047709 | Bc010552      | cDNA sequence BC010552                                                                      |
| 2.188047709 | 4931406c07Rik | RIKEN cDNA 4931406C07 gene                                                                  |
| 2.188047709 | 2610208e05Rik | RIKEN cDNA 2610208E05 gene                                                                  |
| 2.188047709 | 2410011g03Rik | RIKEN cDNA 2410011G03 gene                                                                  |
| 2.188047709 | Irx5          | Iroquois related homeobox 5 (Drosophila)                                                    |
| 2.188047709 | Rnf3          | ring finger protein 3                                                                       |
| 2.188047709 | Aw060207      | expressed sequence AW060207                                                                 |
| 2.188047709 | Gng12         | guanine nucleotide binding protein (G protein), gamma 12                                    |
| 2.188047709 | Lama4         | laminin, alpha 4                                                                            |
| 2.188047709 | Crip2         | cysteine rich protein 2                                                                     |
| 2.188047709 | Tfdp1         | transcription factor Dp 1                                                                   |
| 2.188047709 | Tnnc2         | troponin C2, fast                                                                           |
| 2.324098412 | Elmo3         | engulfment and cell motility 3, ced-12 homolog (C. elegans)                                 |
| 2.324098412 | 1810009b06Rik | RIKEN cDNA 1810009B06 gene                                                                  |
| 2.324098412 | Gas1          | growth arrest specific 1                                                                    |
| 2.324098412 | Maged1        | melanoma antigen, family D, 1                                                               |
| 2.324098412 | 2700055k07Rik | RIKEN cDNA 2700055K07 gene                                                                  |
| 2.324098412 | Hic1          | hypermethylated in cancer 1                                                                 |
| 2.324098412 | Aoc3          | amine oxidase, copper containing 3                                                          |
| 2.324098412 | Bag2          | Bcl2-associated athanogene 2                                                                |
| 2.324098412 | B430320c24Rik | RIKEN cDNA B430320C24 gene                                                                  |
| 2.324098412 | Fem1a         | feminization 1 homolog a (C. elegans)                                                       |
| 2.324098412 | 4933428g09Rik | RIKEN cDNA 4933428G09 gene                                                                  |
| 2.324098412 | Osr2          | odd-skipped related 2 (Drosophila)                                                          |
| 2.324098412 | Serpinh1      | serine (or cysteine) proteinase inhibitor, clade H, member 1                                |
| 2.324098412 | Glg1          | golgi apparatus protein 1                                                                   |
| 2.324098412 | 2310067g05Rik | RIKEN cDNA 2310067G05 gene                                                                  |
| 2.324098412 | Surf1         | surfeit gene 1                                                                              |
| 2.324098412 | 6820429m01    | hypothetical protein 6820429M01                                                             |
| 2.324098412 | Hibadh        | 3-hydroxyisobutyrate dehydrogenase                                                          |
| 2.324098412 | Zfp503        | zinc finger protein 503                                                                     |
| 2.324098412 | Pgam2         | phosphoglycerate mutase 2                                                                   |
| 2.324098412 | Scn1b         | sodium channel, voltage-gated, type I, beta                                                 |
| 2.324098412 | Bc038925      | cDNA sequence BC038925                                                                      |
| 2.324098412 | Pja2          | praja 2, RING-H2 motif containing                                                           |
| 2.324098412 | Zdhhc1        | zinc finger, DHHC domain containing 1                                                       |
| 2.324098412 | Wbscr18       | Williams-Beuren syndrome chromosome region 18 homolog (human)                               |
| 2.324098412 | Nfe2l3        | nuclear factor, erythroid derived 2, like 3                                                 |
| 2.324098412 | Fzd6          | frizzled homolog 6 (Drosophila)                                                             |
| 2.324098412 | Spg20         | spastic paraplegia 20, spartin (Troyer syndrome) homolog (human)                            |
| 2.324098412 | Ecm1          | extracellular matrix protein 1                                                              |
| 2.324098412 | 1110001c20Rik | RIKEN cDNA 1110001C20 gene                                                                  |
| 2.324098412 | 9030425e11Rik | RIKEN cDNA 9030425E11 gene                                                                  |
| 2.324098412 | 6720467c03Rik | RIKEN cDNA 6720467C03 gene                                                                  |
| 2.324098412 | Armc1         | armadillo repeat containing 1                                                               |
| 2.324098412 | Chgb          | chromogranin B                                                                              |
| 2.324098412 | 4632406n01Rik | RIKEN cDNA 4632406N01 gene                                                                  |
| 2.324098412 | Av249152      | expressed sequence AV249152                                                                 |
| 2.324098412 | 2310005o14Rik | RIKEN cDNA 2310005O14 gene                                                                  |
| 2.324098412 | Abhd4         | abhydrolase domain containing 4                                                             |
| 2.324098412 | Mmaa          | methylmalonic aciduria (cobalamin deficiency) type A                                        |
| 2.324098412 | Irf6          | interferon regulatory factor 6                                                              |
| 2.324098412 | Gpd1          | glycerol-3-phosphate dehydrogenase 1 (soluble)                                              |
| 2.324098412 | Mpv17         | Mpv17 transgene, kidney disease mutant                                                      |
| 2.324098412 | Mesdc2        | mesoderm development candidate 2                                                            |
| 2.324098412 | Sdc2          | syndecan 2                                                                                  |
| 2.324098412 | Zcchc3        | zinc finger, CCHC domain containing 3                                                       |
| 2.324098412 | Cluap1        | clusterin associated protein 1                                                              |
| 2.324098412 | MGI:2179725   | candidate tumor suppressor OVCA2                                                            |
| 2.324098412 | Med19         | mediator of RNA polymerase II transcription, subunit 19 homolog (yeast)                     |
| 2.324098412 | Slc2a10       | solute carrier family 2 (facilitated glucose transporter), member 10                        |
| 2.324098412 | Cmkror1       | chemokine orphan receptor 1                                                                 |

|             |               |                                                                           |
|-------------|---------------|---------------------------------------------------------------------------|
| 2.324098412 | 2310016c16Rik | RIKEN cDNA 2310016C16 gene                                                |
| 2.324098412 | Glt8d1        | glycosyltransferase 8 domain containing 1                                 |
| 2.324098412 | Ehhadh        | enoyl-Coenzyme A, hydratase/3-hydroxyacyl Coenzyme A dehydrogenase        |
| 2.324098412 | Gstt2         | glutathione S-transferase, theta 2                                        |
| 2.324098412 | 4831416g18Rik | RIKEN cDNA 4831416G18 gene                                                |
| 2.324098412 | 9030611o19Rik | RIKEN cDNA 9030611O19 gene                                                |
| 2.324098412 | Hoxc9         | homeo box C9                                                              |
| 2.324098412 | Ttc8          | tetratricopeptide repeat domain 8                                         |
| 2.324098412 | Rundc1        | RUN domain containing 1                                                   |
| 2.324098412 | Hey1          | hairy/enhancer-of-split related with YRPW motif 1                         |
| 2.324098412 | Poldip2       | polymerase (DNA-directed), delta interacting protein 2                    |
| 2.324098412 | Cul7          | cullin 7                                                                  |
| 2.324098412 | Carkl         | carbohydrate kinase-like                                                  |
| 2.324098412 | Rbp7          | retinol binding protein 7, cellular                                       |
| 2.324098412 | Cox8b         | cytochrome c oxidase, subunit VIIIb                                       |
| 2.324098412 | 8030466o12Rik | RIKEN cDNA 8030466O12 gene                                                |
| 2.324098412 | Nap1l3        | nucleosome assembly protein 1-like 3                                      |
| 2.324098412 | Pcgf6         | polycomb group ring finger 6                                              |
| 2.324098412 | Cant1         | calcium activated nucleotidase 1                                          |
| 2.324098412 | Rhob          | ras homolog gene family, member B                                         |
| 2.324098412 | Cfl2          | cofilin 2, muscle                                                         |
| 2.324098412 | Chst8         | carbohydrate (N-acetyl)galactosamine 4-O) sulfotransferase 8              |
| 2.324098412 | 5730409k12Rik | RIKEN cDNA 5730409K12 gene                                                |
| 2.324098412 | Sco1          | SCO cytochrome oxidase deficient homolog 1 (yeast)                        |
| 2.324098412 | 1110007f12Rik | RIKEN cDNA 1110007F12 gene                                                |
| 2.324098412 | Wdr35         | WD repeat domain 35                                                       |
| 2.324098412 | Fkbp7         | FK506 binding protein 7                                                   |
| 2.324098412 | Denr          | density-regulated protein                                                 |
| 2.324098412 | Grin1a        | glutamate receptor, ionotropic, N-methyl D-aspartate-like 1A              |
| 2.324098412 | Bc005471      | cDNA sequence BC005471                                                    |
| 2.324098412 | Gtf2h3        | general transcription factor IIH, polypeptide 3                           |
| 2.324098412 | MGI:1889209   | semaF cytoplasmic domain associated protein 2                             |
| 2.324098412 | Igfbp5        | insulin-like growth factor binding protein 5                              |
| 2.324098412 | Gpt2          | glutamic pyruvate transaminase (alanine aminotransferase) 2               |
| 2.433004319 | Spnb3         | spectrin beta 3                                                           |
| 2.433004319 | Pdcd2         | programmed cell death 2                                                   |
| 2.433004319 | Kdelr1        | KDEL (Lys-Asp-Glu-Leu) endoplasmic reticulum protein retention receptor 1 |
| 2.433004319 | 2610319k07Rik | RIKEN cDNA 2610319K07 gene                                                |
| 2.433004319 | Timp2         | tissue inhibitor of metalloproteinase 2                                   |
| 2.433004319 | C530028i08Rik | RIKEN cDNA C530028I08 gene                                                |
| 2.433004319 | Cys1          | cystin 1                                                                  |
| 2.433004319 | Maob          | monoamine oxidase B                                                       |
| 2.433004319 | 4930403j22Rik | RIKEN cDNA 4930403J22 gene                                                |
| 2.433004319 | 2610008e11Rik | RIKEN cDNA 2610008E11 gene                                                |
| 2.433004319 | Ddx28         | DEAD (Asp-Glu-Ala-Asp) box polypeptide 28                                 |
| 2.433004319 | Dbt           | dihydrolipoamide branched chain transacylase E2                           |
| 2.433004319 | D930005d10Rik | RIKEN cDNA D930005D10 gene                                                |
| 2.433004319 | Figf          | c-fos induced growth factor                                               |
| 2.433004319 | Ndufs1        | NADH dehydrogenase (ubiquinone) Fe-S protein 1                            |
| 2.433004319 | Nrbp2         | nuclear receptor binding protein 2                                        |
| 2.433004319 | 5430407p10Rik | RIKEN cDNA 5430407P10 gene                                                |
| 2.433004319 | Fundc2        | FUN14 domain containing 2                                                 |
| 2.433004319 | Sall2         | sal-like 2 (Drosophila)                                                   |
| 2.433004319 | Ccdc5         | coiled-coil domain containing 5                                           |
| 2.433004319 | 1190005i06Rik | RIKEN cDNA 1190005I06 gene                                                |
| 2.433004319 | Ly6d          | lymphocyte antigen 6 complex, locus D                                     |
| 2.433004319 | Ryk           | receptor-like tyrosine kinase                                             |
| 2.433004319 | Tbx18         | T-box18                                                                   |
| 2.433004319 | Bc022687      | cDNA sequence BC022687                                                    |
| 2.433004319 | Spon2         | spondin 2, extracellular matrix protein                                   |
| 2.433004319 | Tpi1          | triosephosphate isomerase 1                                               |
| 2.433004319 | Eif2b1        | eukaryotic translation initiation factor 2B, subunit 1 (alpha)            |
| 2.433004319 | Rwdd3         | RWD domain containing 3                                                   |
| 2.433004319 | Insig2        | insulin induced gene 2                                                    |
| 2.433004319 | Acadsb        | acyl-Coenzyme A dehydrogenase, short/branched chain                       |
| 2.433004319 | Irx2          | Iroquois related homeobox 2 (Drosophila)                                  |
| 2.433004319 | Zfp526        | zinc finger protein 526                                                   |
| 2.433004319 | Chga          | chromogranin A                                                            |
| 2.433004319 | Zfp354a       | zinc finger protein 354A                                                  |
| 2.433004319 | Mrpl22        | mitochondrial ribosomal protein L22                                       |
| 2.433004319 | Pfdn1         | prefoldin 1                                                               |
| 2.433004319 | Sh3tc2        | SH3 domain and tetratricopeptide repeats 2                                |
| 2.433004319 | Khdrbs3       | KH domain containing, RNA binding, signal transduction associated 3       |
| 2.433004319 | Bcl2l14       | Bcl2-like 14 (apoptosis facilitator)                                      |
| 2.433004319 | 1700028n11Rik | RIKEN cDNA 1700028N11 gene                                                |
| 2.433004319 | Jund1         | Jun proto-oncogene related gene d1                                        |
| 2.433004319 | 5730568a12Rik | RIKEN cDNA 5730568A12 gene                                                |
| 2.433004319 | Smyd2         | SET and MYND domain containing 2                                          |
| 2.433004319 | Nfs1          | nitrogen fixation gene 1 (S. cerevisiae)                                  |
| 2.433004319 | Tspan1        | tetraspan 1                                                               |
| 2.433004319 | Ptk9          | protein tyrosine kinase 9                                                 |
| 2.433004319 | Timm8b        | translocase of inner mitochondrial membrane 8 homolog b (yeast)           |
| 2.433004319 | MGI:105968    | taxilin                                                                   |
| 2.433004319 | 1700108j01Rik | RIKEN cDNA 1700108J01 gene                                                |
| 2.433004319 | 6530401n04Rik | RIKEN cDNA 6530401N04 gene                                                |
| 2.433004319 | D11ertd333e   | DNA segment, Chr 11, ERATO Doi 333, expressed                             |
| 2.433004319 | Rasgrp3       | RAS, guanyl releasing protein 3                                           |

|             |                   |                                                                                            |
|-------------|-------------------|--------------------------------------------------------------------------------------------|
| 2.433004319 | Zcchc10           | zinc finger, CCHC domain containing 10                                                     |
| 2.433004319 | H1f0              | H1 histone family, member 0                                                                |
| 2.433004319 | Hcfc1r1           | host cell factor C1 regulator 1 (XPO1-dependent)                                           |
| 2.433004319 | Nisch             | nischarin                                                                                  |
| 2.433004319 | Rhod              | ras homolog gene family, member D                                                          |
| 2.433004319 | 6430601a21Rik     | RIKEN cDNA 6430601A21 gene                                                                 |
| 2.433004319 | Appb1             | amyloid beta (A4) precursor protein-binding, family B, member 1                            |
| 2.433004319 | Fkbp9             | FK506 binding protein 9                                                                    |
| 2.433004319 | Atpif1            | ATPase inhibitory factor 1                                                                 |
| 2.433004319 | Actr6             | ARP6 actin-related protein 6 homolog (yeast)                                               |
| 2.433004319 | 5730466h23Rik     | RIKEN cDNA 5730466H23 gene                                                                 |
| 2.433004319 | Atp1b1            | ATPase, Na <sup>+</sup> /K <sup>+</sup> transporting, beta 1 polypeptide                   |
| 2.433004319 | Eln               | elastin                                                                                    |
| 2.433004319 | Ai481750          | expressed sequence AI481750                                                                |
| 2.433004319 | Pcdhb22           | protocadherin beta 22                                                                      |
| 2.433004319 | Pdgfra            | platelet derived growth factor receptor, alpha polypeptide                                 |
| 2.433004319 | 9030405d14Rik     | RIKEN cDNA 9030405D14 gene                                                                 |
| 2.433004319 | Icrfp703b1614q5.6 | predicted gene ICRFP703B1614Q5.6                                                           |
| 2.433004319 | Dag1              | dystroglycan 1                                                                             |
| 2.433004319 | 2400006a19Rik     | RIKEN cDNA 2400006A19 gene                                                                 |
| 2.433004319 | Atf7              | activating transcription factor 7                                                          |
| 2.433004319 | Pex6              | peroxisomal biogenesis factor 6                                                            |
| 2.433004319 | E430012m05Rik     | RIKEN cDNA E430012M05 gene                                                                 |
| 2.433004319 | Ccnj              | cyclin J                                                                                   |
| 2.433004319 | Nudt6             | nudix (nucleoside diphosphate linked moiety X)-type motif 6                                |
| 2.433004319 | Dpep1             | dipeptidase 1 (renal)                                                                      |
| 2.433004319 | Dapk3             | death-associated kinase 3                                                                  |
| 2.433004319 | Gpatc1            | G patch domain containing 1                                                                |
| 2.433004319 | Zfp482            | zinc finger protein 482                                                                    |
| 2.433004319 | Tbcc              | tubulin-specific chaperone c                                                               |
| 2.433004319 | Gas6              | growth arrest specific 6                                                                   |
| 2.433004319 | Amacr             | alpha-methylacyl-CoA racemase                                                              |
| 2.433004319 | 2810003c17Rik     | RIKEN cDNA 2810003C17 gene                                                                 |
| 2.433004319 | 2310066i18Rik     | RIKEN cDNA 2310066I18 gene                                                                 |
| 2.433004319 | MGI:2678023       | homeodomain leucine zipper-encoding gene                                                   |
| 2.433004319 | Sult5a1           | sulfotransferase family 5A, member 1                                                       |
| 2.433004319 | Krt2-7            | keratin complex 2, basic, gene 7                                                           |
| 2.433004319 | Gprc5c            | G protein-coupled receptor, family C, group 5, member C                                    |
| 2.433004319 | Smpd3             | sphingomyelin phosphodiesterase 3, neutral                                                 |
| 2.433004319 | Gkap1             | G kinase anchoring protein 1                                                               |
| 2.433004319 | Acadl             | acetyl-Coenzyme A dehydrogenase, long-chain                                                |
| 2.433004319 | Clpx              | caseinolytic protease X (E.coli)                                                           |
| 2.433004319 | Slc7a2            | solute carrier family 7 (cationic amino acid transporter, y <sup>+</sup> system), member 2 |
| 2.433004319 | Lu                | Lutheran blood group (Auberger b antigen included)                                         |
| 2.433004319 | C330018k18Rik     | RIKEN cDNA C330018K18 gene                                                                 |
| 2.433004319 | 1810037c20Rik     | RIKEN cDNA 1810037C20 gene                                                                 |
| 2.433004319 | Rnf144            | ring finger protein 144                                                                    |
| 2.433004319 | Lace1             | lactation elevated 1                                                                       |
| 2.433004319 | 9830169c18Rik     | RIKEN cDNA 9830169C18 gene                                                                 |
| 2.433004319 | Igfbp4            | insulin-like growth factor binding protein 4                                               |
| 2.433004319 | Ebp               | phenylalkylamine Ca <sup>2+</sup> antagonist (emopamil) binding protein                    |
| 2.433004319 | 1810011o10Rik     | RIKEN cDNA 1810011O10 gene                                                                 |
| 2.433004319 | Acads             | acyl-Coenzyme A dehydrogenase, short chain                                                 |
| 2.433004319 | D830019k17Rik     | RIKEN cDNA D830019K17 gene                                                                 |
| 2.433004319 | 2610317d23Rik     | RIKEN cDNA 2610317D23 gene                                                                 |
| 2.433004319 | Pgea1             | PKD2 interactor, golgi and endoplasmic reticulum associated 1                              |
| 2.433004319 | Slc30a6           | solute carrier family 30 (zinc transporter), member 6                                      |
| 2.433004319 | 1700006d24Rik     | RIKEN cDNA 1700006D24 gene                                                                 |
| 2.433004319 | 2900070e19Rik     | RIKEN cDNA 2900070E19 gene                                                                 |
| 2.433004319 | 8430427h17Rik     | RIKEN cDNA 8430427H17 gene                                                                 |
| 2.433004319 | Crelld1           | cysteine-rich with EGF-like domains 1                                                      |
| 2.433004319 | MGI:2136405       | glucuronyl C5-epimerase                                                                    |
| 2.433004319 | Rab18             | RAB18, member RAS oncogene family                                                          |
| 2.433004319 | 2700097o09Rik     | RIKEN cDNA 2700097O09 gene                                                                 |
| 2.433004319 | Podxl             | podocalyxin-like                                                                           |
| 2.433004319 | Bbs4              | Bardet-Bied syndrome 4 homolog (human)                                                     |
| 2.433004319 | 1810042k04Rik     | RIKEN cDNA 1810042K04 gene                                                                 |
| 2.433004319 | 0610006o14Rik     | RIKEN cDNA 0610006O14 gene                                                                 |
| 2.433004319 | Stx17             | syntaxin 17                                                                                |
| 2.433004319 | Klf2              | Kruppel-like factor 2 (lung)                                                               |
| 2.433004319 | Lgals7            | lectin, galactose binding, soluble 7                                                       |
| 2.433004319 | Rassf6            | Ras association (RalGDS/AF-6) domain family 6                                              |
| 2.433004319 | Nbl1              | neuroblastoma, suppression of tumorigenicity 1                                             |
| 2.433004319 | Gpr89             | G protein-coupled receptor 89                                                              |
| 2.433004319 | Xpc               | xeroderma pigmentosum, complementation group C                                             |
| 2.433004319 | Ndufb10           | NADH dehydrogenase (ubiquinone) 1 beta subcomplex, 10                                      |
| 2.433004319 | Cyp2d26           | cytochrome P450, family 2, subfamily d, polypeptide 26                                     |
| 2.433004319 | 2310047k21Rik     | RIKEN cDNA 2310047K21 gene                                                                 |
| 2.433004319 | Bc018242          | cDNA sequence BC018242                                                                     |
| 2.433004319 | Itih2             | inter-alpha trypsin inhibitor, heavy chain 2                                               |
| 2.433004319 | Itgb6             | integrin beta 6                                                                            |
| 2.799303861 | Egr1              | early growth response 1                                                                    |
| 2.799303861 | Plek2             | pleckstrin 2                                                                               |
| 2.799303861 | Krt1-18           | keratin complex 1, acidic, gene 18                                                         |
| 2.799303861 | Prkcζ             | protein kinase C, zeta                                                                     |
| 2.799303861 | 4921504n20Rik     | RIKEN cDNA 4921504N20 gene                                                                 |
| 2.799303861 | Ssr2              | signal sequence receptor, beta                                                             |

|             |               |                                                                                                                  |
|-------------|---------------|------------------------------------------------------------------------------------------------------------------|
| 2.799303861 | Parva         | parvin, alpha                                                                                                    |
| 2.799303861 | Polr3k        | polymerase (RNA) III (DNA directed) polypeptide K                                                                |
| 2.799303861 | Fgfr2         | fibroblast growth factor receptor 2                                                                              |
| 2.799303861 | 3000004n20Rik | RIKEN cDNA 3000004N20 gene                                                                                       |
| 2.799303861 | Elof1         | elongation factor 1 homolog (ELF1, <i>S. cerevisiae</i> )                                                        |
| 2.799303861 | Acrbp         | proacrosin binding protein                                                                                       |
| 2.799303861 | St14          | suppression of tumorigenicity 14 (colon carcinoma)                                                               |
| 2.799303861 | Suc1g1        | succinate-CoA ligase, GDP-forming, alpha subunit                                                                 |
| 2.799303861 | Nudt12        | nudix (nucleoside diphosphate linked moiety X)-type motif 12                                                     |
| 2.799303861 | Rnf13         | ring finger protein 13                                                                                           |
| 2.799303861 | Pex19         | peroxisome biogenesis factor 19                                                                                  |
| 2.799303861 | Poll          | polymerase (DNA directed), lambda                                                                                |
| 2.799303861 | Znf250        | zinc finger protein 250                                                                                          |
| 2.799303861 | Mrps22        | mitochondrial ribosomal protein S22                                                                              |
| 2.799303861 | Bc006705      | cDNA sequence BC006705                                                                                           |
| 2.799303861 | Mfn2          | mitofusin 2                                                                                                      |
| 2.799303861 | Wdr39         | WD repeat domain 39                                                                                              |
| 2.799303861 | Lgr6          | leucine-rich repeat-containing G protein-coupled receptor 6                                                      |
| 2.799303861 | 9630054f20Rik | RIKEN cDNA 9630054F20 gene                                                                                       |
| 2.799303861 | Gm944         | gene model 944, (NCBI)                                                                                           |
| 2.799303861 | Krt2-6b       | keratin complex 2, basic, gene 6b                                                                                |
| 2.799303861 | Bc034099      | cDNA sequence BC034099                                                                                           |
| 2.799303861 | Nr1i4         | nuclear receptor subfamily 1, group I, member 4                                                                  |
| 2.799303861 | Acadm         | acetyl-Coenzyme A dehydrogenase, medium chain                                                                    |
| 2.799303861 | Slc2a4        | solute carrier family 2 (facilitated glucose transporter), member 4                                              |
| 2.799303861 | Zfp68         | zinc finger protein 68                                                                                           |
| 2.799303861 | Vps45a        | vacuolar protein sorting 45A (yeast)                                                                             |
| 2.799303861 | E430034l04Rik | RIKEN cDNA E430034L04 gene                                                                                       |
| 2.799303861 | Idh3a         | isocitrate dehydrogenase 3 (NAD+) alpha                                                                          |
| 2.799303861 | Epm2aip1      | EPM2A (laforin) interacting protein 1                                                                            |
| 2.799303861 | Nutf2         | nuclear transport factor 2                                                                                       |
| 2.799303861 | Pfkm          | phosphofruktokinase, muscle                                                                                      |
| 2.799303861 | Tmem14a       | transmembrane protein 14A                                                                                        |
| 2.799303861 | Des           | desmin                                                                                                           |
| 2.799303861 | Ptov1         | prostate tumor over expressed gene 1                                                                             |
| 2.799303861 | Yif1          | Yip1 interacting factor homolog ( <i>S. cerevisiae</i> )                                                         |
| 2.799303861 | Mrps35        | mitochondrial ribosomal protein S35                                                                              |
| 2.799303861 | Narg2         | NMDA receptor-regulated gene 2                                                                                   |
| 2.799303861 | Bc024063      | cDNA sequence BC024063                                                                                           |
| 2.799303861 | Baiap211      | BAI1-associated protein 2-like 1                                                                                 |
| 2.799303861 | Zfp75         | zinc finger protein 75                                                                                           |
| 2.799303861 | Polrmt        | polymerase (RNA) mitochondrial (DNA directed)                                                                    |
| 2.799303861 | 4732418c07Rik | RIKEN cDNA 4732418C07 gene                                                                                       |
| 2.799303861 | Usp20         | ubiquitin specific protease 20                                                                                   |
| 2.799303861 | Prkaa2        | protein kinase, AMP-activated, alpha 2 catalytic subunit                                                         |
| 2.799303861 | 1500041b16Rik | RIKEN cDNA 1500041B16 gene                                                                                       |
| 2.799303861 | Snrk          | SNF related kinase                                                                                               |
| 2.799303861 | Wdr21         | WD repeat domain 21                                                                                              |
| 2.799303861 | Cd81          | CD 81 antigen                                                                                                    |
| 2.799303861 | Lifr          | leukemia inhibitory factor receptor                                                                              |
| 2.799303861 | Cul4a         | cullin 4A                                                                                                        |
| 2.799303861 | 3110048e14Rik | RIKEN cDNA 3110048E14 gene                                                                                       |
| 2.799303861 | Smtln         | smoothelin                                                                                                       |
| 2.799303861 | Slc25a24      | solute carrier family 25 (mitochondrial carrier, phosphate carrier), member 24                                   |
| 2.799303861 | Bc016226      | cDNA sequence BC016226                                                                                           |
| 2.799303861 | 3110050n22Rik | RIKEN cDNA 3110050N22 gene                                                                                       |
| 2.799303861 | Pycr2         | pyrroline-5-carboxylate reductase family, member 2                                                               |
| 2.799303861 | Aw743872      | expressed sequence AW743872                                                                                      |
| 2.799303861 | 2610019p18Rik | RIKEN cDNA 2610019P18 gene                                                                                       |
| 2.799303861 | Trmt1         | tRNA (5-methylaminomethyl-2-thiouridylate)-methyltransferase 1                                                   |
| 2.799303861 | MGI:2384914   | Dip3 beta                                                                                                        |
| 2.799303861 | Zfp623        | zinc finger protein 623                                                                                          |
| 2.799303861 | B230118h07Rik | RIKEN cDNA B230118H07 gene                                                                                       |
| 2.799303861 | 2410015m20Rik | RIKEN cDNA 2410015M20 gene                                                                                       |
| 2.799303861 | Zfp61         | zinc finger protein 61                                                                                           |
| 2.799303861 | Vsig2         | V-set and immunoglobulin domain containing 2                                                                     |
| 2.799303861 | Nkiras1       | NFKB inhibitor interacting Ras-like protein 1                                                                    |
| 2.799303861 | Slc35c1       | solute carrier family 35, member C1                                                                              |
| 2.799303861 | Sfrp2         | secreted frizzled-related sequence protein 2                                                                     |
| 2.799303861 | Rer1          | RER1 retention in endoplasmic reticulum 1 homolog ( <i>S. cerevisiae</i> )                                       |
| 2.799303861 | 8230402k04Rik | RIKEN cDNA 8230402K04 gene                                                                                       |
| 2.799303861 | 6330512m04Rik | RIKEN cDNA 6330512M04 gene                                                                                       |
| 2.799303861 | Sema4g        | sema domain, immunoglobulin domain (Ig), transmembrane domain (TM) and short cytoplasmic domain, (semaphorin) 4G |
| 2.799303861 | Twsg1         | twisted gastrulation homolog 1 ( <i>Drosophila</i> )                                                             |
| 2.799303861 | Ras12         | RAS-like, family 12                                                                                              |
| 2.799303861 | 1810063b05Rik | RIKEN cDNA 1810063B05 gene                                                                                       |
| 2.799303861 | Fads3         | fatty acid desaturase 3                                                                                          |
| 2.799303861 | 4930507c10Rik | RIKEN cDNA 4930507C10 gene                                                                                       |
| 2.799303861 | Ntn4          | netrin 4                                                                                                         |
| 2.799303861 | Keap1         | kelch-like ECH-associated protein 1                                                                              |
| 2.799303861 | Gnpat         | glyceronephosphate O-acyltransferase                                                                             |
| 2.799303861 | Fbxo9         | f-box only protein 9                                                                                             |
| 2.799303861 | Arhgap5       | Rho GTPase activating protein 5                                                                                  |
| 2.799303861 | Btdb6         | BTB (POZ) domain containing 6                                                                                    |
| 2.799303861 | Bet1l         | blocked early in transport 1 homolog ( <i>S. cerevisiae</i> )-like                                               |
| 2.799303861 | Scara3        | scavenger receptor class A, member 3                                                                             |
| 2.799303861 | 2310022m17Rik | RIKEN cDNA 2310022M17 gene                                                                                       |

|             |               |                                                                                                                |
|-------------|---------------|----------------------------------------------------------------------------------------------------------------|
| 2.799303861 | Efnb1         | ephrin B1                                                                                                      |
| 2.799303861 | Colec11       | collectin sub-family member 11                                                                                 |
| 2.799303861 | Rhobtb3       | Rho-related BTB domain containing 3                                                                            |
| 2.799303861 | 3110056003Rik | RIKEN cDNA 3110056003 gene                                                                                     |
| 2.799303861 | 2810422b04Rik | RIKEN cDNA 2810422B04 gene                                                                                     |
| 2.799303861 | 4932442k08Rik | RIKEN cDNA 4932442K08 gene                                                                                     |
| 2.799303861 | Lrig3         | leucine-rich repeats and immunoglobulin-like domains 3                                                         |
| 2.799303861 | Tcte1l        | t-complex-associated-testis-expressed 1-like                                                                   |
| 2.799303861 | Sorbs3        | sorbin and SH3 domain containing 3                                                                             |
| 2.799303861 | Rshl2         | radial spokehead-like 2                                                                                        |
| 2.799303861 | Acta1         | actin, alpha 1, skeletal muscle                                                                                |
| 2.799303861 | Oplah         | 5-oxoprolinase (ATP-hydrolysing)                                                                               |
| 2.799303861 | 1810046j19Rik | RIKEN cDNA 1810046J19 gene                                                                                     |
| 2.799303861 | 5430431g03Rik | RIKEN cDNA 5430431G03 gene                                                                                     |
| 2.799303861 | Guk1          | guanylate kinase 1                                                                                             |
| 2.799303861 | Cdipt         | CDP-diacylglycerol--inositol 3-phosphatidyltransferase (phosphatidylinositol synthase)                         |
| 2.799303861 | 2610209m04Rik | RIKEN cDNA 2610209M04 gene                                                                                     |
| 2.799303861 | 3110023e09Rik | RIKEN cDNA 3110023E09 gene                                                                                     |
| 2.799303861 | 0610040j01Rik | RIKEN cDNA 0610040J01 gene                                                                                     |
| 2.799303861 | Mtapa         | methylthioadenosine phosphorylase                                                                              |
| 2.799303861 | Brd3          | bromodomain containing 3                                                                                       |
| 2.799303861 | Fbxo18        | F-box protein 18                                                                                               |
| 3.425670081 | Scamp1        | secretory carrier membrane protein 1                                                                           |
| 3.425670081 | Fyco1         | FYVE and coiled-coil domain containing 1                                                                       |
| 3.425670081 | Mkrn2         | makorin, ring finger protein, 2                                                                                |
| 3.425670081 | Adh1a         | alcohol dehydrogenase 1A (class I), alpha polypeptide                                                          |
| 3.425670081 | Polr2d        | polymerase (RNA) II (DNA directed) polypeptide D                                                               |
| 3.425670081 | Dexi          | dexamethasone-induced transcript                                                                               |
| 3.425670081 | ErbB2         | v-erb-b2 erythroblastic leukemia viral oncogene homolog 2, neuro/glioblastoma derived oncogene homolog (avian) |
| 3.425670081 | 1110001a12Rik | RIKEN cDNA 1110001A12 gene                                                                                     |
| 3.425670081 | Cox7b         | cytochrome c oxidase subunit VIIb                                                                              |
| 3.425670081 | Aa986860      | expressed sequence AA986860                                                                                    |
| 3.425670081 | Mycbp         | c-myc binding protein                                                                                          |
| 3.425670081 | Tmem42        | transmembrane protein 42                                                                                       |
| 3.425670081 | Areg          | amphiregulin                                                                                                   |
| 3.425670081 | E130306m17Rik | RIKEN cDNA E130306M17 gene                                                                                     |
| 3.425670081 | Pgrmc1        | progesterone receptor membrane component 1                                                                     |
| 3.425670081 | Casp7         | caspase 7                                                                                                      |
| 3.425670081 | Rnf14         | ring finger protein 14                                                                                         |
| 3.425670081 | Skb1          | SKB1 homolog (S. pombe)                                                                                        |
| 3.425670081 | 1500031m22Rik | RIKEN cDNA 1500031M22 gene                                                                                     |
| 3.425670081 | 0610039a15Rik | RIKEN cDNA 0610039A15 gene                                                                                     |
| 3.425670081 | Col6a2        | procollagen, type VI, alpha 2                                                                                  |
| 3.425670081 | Tcta          | T-cell leukemia translocation altered gene                                                                     |
| 3.425670081 | Col4a1        | procollagen, type IV, alpha 1                                                                                  |
| 3.425670081 | Araf          | v-raf murine sarcoma 3611 viral oncogene homolog                                                               |
| 3.425670081 | 5730521e12Rik | RIKEN cDNA 5730521E12 gene                                                                                     |
| 3.425670081 | Cirbp         | cold inducible RNA binding protein                                                                             |
| 3.425670081 | Pcgf4         | polycomb group ring finger 4                                                                                   |
| 3.425670081 | Mesp2         | mesoderm posterior 2                                                                                           |
| 3.425670081 | Ddah2         | dimethylarginine dimethylaminohydrolase 2                                                                      |
| 3.425670081 | Azi2          | 5-azacytidine induced gene 2                                                                                   |
| 3.425670081 | Loh12cr1      | loss of heterozygosity, 12, chromosomal region 1 homolog (human)                                               |
| 3.425670081 | 1110032e23Rik | RIKEN cDNA 1110032E23 gene                                                                                     |
| 3.425670081 | Actn4         | actinin alpha 4                                                                                                |
| 3.425670081 | Uch14         | ubiquitin carboxyl-terminal esterase L4                                                                        |
| 3.425670081 | 9130213b05Rik | RIKEN cDNA 9130213B05 gene                                                                                     |
| 3.425670081 | Dusp6         | dual specificity phosphatase 6                                                                                 |
| 3.425670081 | Gosr1         | golgi SNAP receptor complex member 1                                                                           |
| 3.425670081 | 0610037h22Rik | RIKEN cDNA 0610037H22 gene                                                                                     |
| 3.425670081 | Pdgfrr1       | platelet-derived growth factor receptor-like                                                                   |
| 3.425670081 | Phyh          | phytanoyl-CoA hydroxylase                                                                                      |
| 3.425670081 | Cxzc5         | CXXC finger 5                                                                                                  |
| 3.425670081 | 6430596g11Rik | RIKEN cDNA 6430596G11 gene                                                                                     |
| 3.425670081 | Bc017158      | cDNA sequence BC017158                                                                                         |
| 3.425670081 | D1bwg0212e    | DNA segment, Chr 1, Brigham & Women's Genetics 0212 expressed                                                  |
| 3.425670081 | 1810045k17Rik | RIKEN cDNA 1810045K17 gene                                                                                     |
| 3.425670081 | Abcb9         | ATP-binding cassette, sub-family B (MDR/TAP), member 9                                                         |
| 3.425670081 | 1110001a23Rik | RIKEN cDNA 1110001A23 gene                                                                                     |
| 3.425670081 | Rnpepl1       | arginyl aminopeptidase (aminopeptidase B)-like 1                                                               |
| 3.425670081 | Nid2          | nidogen 2                                                                                                      |
| 3.425670081 | Pdlim3        | PDZ and LIM domain 3                                                                                           |
| 3.425670081 | Them2         | thioesterase superfamily member 2                                                                              |
| 3.425670081 | Zfp212        | Zinc finger protein 212                                                                                        |
| 3.425670081 | 1110030h02Rik | RIKEN cDNA 1110030H02 gene                                                                                     |
| 3.425670081 | 1200007b05Rik | RIKEN cDNA 1200007B05 gene                                                                                     |
| 3.425670081 | C80913        | expressed sequence C80913                                                                                      |
| 3.425670081 | Scnn1a        | sodium channel, nonvoltage-gated, type I, alpha                                                                |
| 3.425670081 | Loc383229     | similar to hemoglobin alpha chain - slender loris                                                              |
| 3.425670081 | Padi3         | peptidyl arginine deiminase, type III                                                                          |
| 3.425670081 | D11ertd99e    | DNA segment, Chr 11, ERATO Doi 99, expressed                                                                   |
| 3.425670081 | Timm10        | translocase of inner mitochondrial membrane 10 homolog (yeast)                                                 |
| 3.425670081 | Ccs           | copper chaperone for superoxide dismutase                                                                      |
| 3.425670081 | Mst1r         | macrophage stimulating 1 receptor (c-met-related tyrosine kinase)                                              |
| 3.425670081 | 2610511e22Rik | RIKEN cDNA 2610511E22 gene                                                                                     |
| 3.425670081 | Rhot2         | ras homolog gene family, member T2                                                                             |
| 3.425670081 | 1700013g20Rik | RIKEN cDNA 1700013G20 gene                                                                                     |

|             |               |                                                                                        |
|-------------|---------------|----------------------------------------------------------------------------------------|
| 3.425670081 | Tgfa          | transforming growth factor alpha                                                       |
| 3.425670081 | 4930455f23Rik | RIKEN cDNA 4930455F23 gene                                                             |
| 3.425670081 | Bace2         | beta-site APP-cleaving enzyme 2                                                        |
| 3.425670081 | Entpd3        | ectonucleoside triphosphate diphosphohydrolase 3                                       |
| 3.425670081 | Tcf15         | transcription factor 15                                                                |
| 3.425670081 | Arv1          | ARV1 homolog (yeast)                                                                   |
| 3.425670081 | Serhl         | serine hydrolase-like                                                                  |
| 3.425670081 | Krt1-13       | keratin complex 1, acidic, gene 13                                                     |
| 3.425670081 | Car11         | carbonic anhydrase 11                                                                  |
| 3.425670081 | Dock1         | dedicator of cyto-kinesis 1                                                            |
| 3.425670081 | Ctf1          | cardiotrophin 1                                                                        |
| 3.425670081 | Mlh1          | mutL homolog 1 (E. coli)                                                               |
| 3.425670081 | Hsbp1         | heat shock factor binding protein 1                                                    |
| 3.425670081 | 3010026o09Rik | RIKEN cDNA 3010026O09 gene                                                             |
| 3.425670081 | Zfp202        | zinc finger protein 202                                                                |
| 3.425670081 | 4930563c04Rik | RIKEN cDNA 4930563C04 gene                                                             |
| 3.425670081 | 1810037k07Rik | RIKEN cDNA 1810037K07 gene                                                             |
| 3.425670081 | Six5          | sine oculis-related homeobox 5 homolog (Drosophila)                                    |
| 3.425670081 | Pkp2          | plakophilin 2                                                                          |
| 3.425670081 | MGI:2446326   | suprabasin                                                                             |
| 3.425670081 | Fbx14         | F-box and leucine-rich repeat protein 4                                                |
| 3.425670081 | Gm631         | gene model 631, (NCBI)                                                                 |
| 3.425670081 | Olf1r181      | olfactory receptor 181                                                                 |
| 3.425670081 | Tmlhe         | trimethyllysine hydroxylase, epsilon                                                   |
| 3.425670081 | MGI:1927369   | RB-associated KRAB repressor                                                           |
| 3.425670081 | Chek2         | CHK2 checkpoint homolog (S. pombe)                                                     |
| 3.425670081 | Ralbp1        | ralA binding protein 1                                                                 |
| 3.425670081 | Muted         | muted                                                                                  |
| 3.425670081 | Ccnh          | cyclin H                                                                               |
| 3.425670081 | Lefty1        | left right determination factor 1                                                      |
| 3.425670081 | Pxmp2         | peroxisomal membrane protein 2                                                         |
| 3.425670081 | Tloc1         | translocation protein 1                                                                |
| 3.425670081 | Otog          | otogelin                                                                               |
| 3.425670081 | 3830402i07Rik | RIKEN cDNA 3830402I07 gene                                                             |
| 3.425670081 | Rdh13         | retinol dehydrogenase 13 (all-trans and 9-cis)                                         |
| 3.425670081 | Scly          | selenocysteine lyase                                                                   |
| 3.425670081 | Leprel2       | leprecan-like 2                                                                        |
| 3.425670081 | Bc013529      | cDNA sequence BC013529                                                                 |
| 3.425670081 | Evc2          | Ellis van Creveld syndrome 2 homolog (human)                                           |
| 3.425670081 | Gnai1         | guanine nucleotide binding protein, alpha inhibiting 1                                 |
| 3.425670081 | Olf1r159      | olfactory receptor 159                                                                 |
| 3.425670081 | Pms2          | postmeiotic segregation increased 2 (S. cerevisiae)                                    |
| 3.425670081 | Zfp449        | zinc finger protein 449                                                                |
| 3.425670081 | 2310008m10Rik | RIKEN cDNA 2310008M10 gene                                                             |
| 3.425670081 | Aa407659      | expressed sequence AA407659                                                            |
| 3.425670081 | Spfh2         | SPFH domain family, member 2                                                           |
| 3.425670081 | Rras          | Harvey rat sarcoma oncogene, subgroup R                                                |
| 3.425670081 | Ssbp1         | single-stranded DNA binding protein 1                                                  |
| 3.425670081 | E130306i01Rik | RIKEN cDNA E130306I01 gene                                                             |
| 3.425670081 | B430104h02Rik | RIKEN cDNA B430104H02 gene                                                             |
| 3.425670081 | 4632409l22Rik | RIKEN cDNA 4632409L22 gene                                                             |
| 3.425670081 | Pdrg1         | p53 and DNA damage regulated 1                                                         |
| 3.425670081 | Vps24         | vacuolar protein sorting 24 (yeast)                                                    |
| 3.425670081 | 5830454e08Rik | RIKEN cDNA 5830454E08 gene                                                             |
| 3.425670081 | Fkbp14        | FK506 binding protein 14                                                               |
| 3.976065312 | 3110006p09Rik | RIKEN cDNA 3110006P09 gene                                                             |
| 3.976065312 | MGI:1915703   | GPI-anchored HDL-binding protein 1                                                     |
| 3.976065312 | 0710001b24Rik | RIKEN cDNA 0710001B24 gene                                                             |
| 3.976065312 | Rfng          | radical fringe gene homolog (Drosophila)                                               |
| 3.976065312 | Col4a2        | procollagen, type IV, alpha 2                                                          |
| 3.976065312 | Cox6a1        | cytochrome c oxidase, subunit VI a, polypeptide 1                                      |
| 3.976065312 | Pomt2         | protein-O-mannosyltransferase 2                                                        |
| 3.976065312 | Scg3          | secretogranin III                                                                      |
| 3.976065312 | Bphl          | biphenyl hydrolase-like (serine hydrolase, breast epithelial mucin-associated antigen) |
| 3.976065312 | Mtrf1l        | mitochondrial translational release factor 1-like                                      |
| 3.976065312 | Galnt3        | UDP-N-acetyl-alpha-D-galactosamine:polypeptide N-acetylgalactosaminyltransferase 3     |
| 3.976065312 | Nat2          | N-acetyltransferase 2 (arylamine N-acetyltransferase)                                  |
| 3.976065312 | 2700082d03Rik | RIKEN cDNA 2700082D03 gene                                                             |
| 3.976065312 | 2610040c18Rik | RIKEN cDNA 2610040C18 gene                                                             |
| 3.976065312 | Snai2         | snail homolog 2 (Drosophila)                                                           |
| 3.976065312 | G630055p03Rik | RIKEN cDNA G630055P03 gene                                                             |
| 3.976065312 | Crot          | carnitine O-octanoyltransferase                                                        |
| 3.976065312 | Arhgef12      | Rho guanine nucleotide exchange factor (GEF) 12                                        |
| 3.976065312 | Eva1          | epithelial V-like antigen 1                                                            |
| 3.976065312 | Tsga14        | testis specific gene A14                                                               |
| 3.976065312 | Gpsm2         | G-protein signalling modulator 2 (AGS3-like, C. elegans)                               |
| 3.976065312 | Ctbp2         | C-terminal binding protein 2                                                           |
| 3.976065312 | Trpm4         | transient receptor potential cation channel, subfamily M, member 4                     |
| 3.976065312 | 5730461k03Rik | RIKEN cDNA 5730461K03 gene                                                             |
| 3.976065312 | Gle1l         | GLE1 RNA export mediator-like (yeast)                                                  |
| 3.976065312 | Nsmce1        | non-SMC element 1 homolog (S. cerevisiae)                                              |
| 3.976065312 | Lyp1a1        | lysophospholipase-like 1                                                               |
| 3.976065312 | 1190017o12Rik | RIKEN cDNA 1190017O12 gene                                                             |
| 3.976065312 | Ddit4l        | DNA-damage-inducible transcript 4-like                                                 |
| 3.976065312 | Lpp           | LIM domain containing preferred translocation partner in lipoma                        |
| 3.976065312 | Tm7sf2        | transmembrane 7 superfamily member 2                                                   |
| 3.976065312 | Bc011487      | cDNA sequence BC011487                                                                 |

|             |               |                                                                                               |
|-------------|---------------|-----------------------------------------------------------------------------------------------|
| 3.976065312 | 1300002c08Rik | RIKEN cDNA 1300002C08 gene                                                                    |
| 3.976065312 | Tbx15         | T-box 15                                                                                      |
| 3.976065312 | MGI:1914434   | genes associated with retinoid-IFN-induced mortality 19                                       |
| 3.976065312 | Plscr4        | phospholipid scramblase 4                                                                     |
| 3.976065312 | Opn3          | opsin (encephalopsin)                                                                         |
| 3.976065312 | C77668        | expressed sequence C77668                                                                     |
| 3.976065312 | A830007p12Rik | RIKEN cDNA A830007P12 gene                                                                    |
| 3.976065312 | Cda           | cytidine deaminase                                                                            |
| 3.976065312 | Jag2          | jagged 2                                                                                      |
| 3.976065312 | Ech1          | enoyl coenzyme A hydratase 1, peroxisomal                                                     |
| 3.976065312 | Lgtn          | ligatin                                                                                       |
| 3.976065312 | Mrpl49        | mitochondrial ribosomal protein L49                                                           |
| 3.976065312 | Nexn          | nexilin                                                                                       |
| 3.976065312 | Scd3          | stearyl-coenzyme A desaturase 3                                                               |
| 3.976065312 | Krtap4-7      | keratin associated protein 4-7                                                                |
| 3.976065312 | Kdelr2        | KDEL (Lys-Asp-Glu-Leu) endoplasmic reticulum protein retention receptor 2                     |
| 3.976065312 | Bc020002      | cDNA sequence BC020002                                                                        |
| 3.976065312 | Cyp20a1       | cytochrome P450, family 20, subfamily A, polypeptide 1                                        |
| 3.976065312 | Nucb2         | nucleobindin 2                                                                                |
| 3.976065312 | 1110004e09Rik | RIKEN cDNA 1110004E09 gene                                                                    |
| 3.976065312 | Lig4          | ligase IV, DNA, ATP-dependent                                                                 |
| 3.976065312 | 2810055f11Rik | RIKEN cDNA 2810055F11 gene                                                                    |
| 3.976065312 | Twist2        | twist homolog 2 (Drosophila)                                                                  |
| 3.976065312 | Nudt7         | nudix (nucleoside diphosphate linked moiety X)-type motif 7                                   |
| 3.976065312 | Rhou          | ras homolog gene family, member U                                                             |
| 3.976065312 | E130303b06Rik | RIKEN cDNA E130303B06 gene                                                                    |
| 3.976065312 | 1600002h07Rik | RIKEN cDNA 1600002H07 gene                                                                    |
| 3.976065312 | Bc056485      | cDNA sequence BC056485                                                                        |
| 3.976065312 | Phf17         | PHD finger protein 17                                                                         |
| 3.976065312 | 3110040n11Rik | RIKEN cDNA 3110040N11 gene                                                                    |
| 3.976065312 | Mrp63         | mitochondrial ribosomal protein 63                                                            |
| 3.976065312 | 2610002m06Rik | RIKEN cDNA 2610002M06 gene                                                                    |
| 3.976065312 | Mrpl11        | mitochondrial ribosomal protein L11                                                           |
| 3.976065312 | Abhd14a       | abhydrolase domain containing 14A                                                             |
| 3.976065312 | Sptlc1        | serine palmitoyltransferase, long chain base subunit 1                                        |
| 3.976065312 | Mmp15         | matrix metalloproteinase 15                                                                   |
| 3.976065312 | Cap2          | CAP, adenylate cyclase-associated protein, 2 (yeast)                                          |
| 3.976065312 | Cdkn1c        | cyclin-dependent kinase inhibitor 1C (P57)                                                    |
| 3.976065312 | 8430408g22Rik | RIKEN cDNA 8430408G22 gene                                                                    |
| 3.976065312 | Akp2          | alkaline phosphatase 2, liver                                                                 |
| 3.976065312 | Elp3          | elongation protein 3 homolog (S. cerevisiae)                                                  |
| 3.976065312 | MGI:1913570   | HSPC171 protein                                                                               |
| 3.976065312 | Txn1l         | thioredoxin-like 1                                                                            |
| 3.976065312 | Galnt2        | UDP-N-acetyl-alpha-D-galactosamine:polypeptide N-acetylgalactosaminyltransferase 2            |
| 3.976065312 | Bc010787      | cDNA sequence BC010787                                                                        |
| 3.976065312 | Tsta3         | tissue specific transplantation antigen P35B                                                  |
| 3.976065312 | Phpt1         | phosphohistidine phosphatase 1                                                                |
| 3.976065312 | Hibch         | 3-hydroxyisobutyryl-Coenzyme A hydrolase                                                      |
| 3.976065312 | Ghr           | growth hormone receptor                                                                       |
| 3.976065312 | Mtx2          | metaxin 2                                                                                     |
| 3.976065312 | Cdkl2         | cyclin-dependent kinase-like 2 (CDC2-related kinase)                                          |
| 3.976065312 | Cfh           | complement component factor h                                                                 |
| 3.976065312 | 2310046g15Rik | RIKEN cDNA 2310046G15 gene                                                                    |
| 3.976065312 | Znf319        | zinc finger protein 319                                                                       |
| 3.976065312 | Bc035537      | cDNA sequence BC035537                                                                        |
| 3.976065312 | Actl6a        | actin-like 6A                                                                                 |
| 3.976065312 | 5330431n19Rik | RIKEN cDNA 5330431N19 gene                                                                    |
| 3.976065312 | Adamts18      | a disintegrin-like and metalloprotease (reprolysin type) with thrombospondin type 1 motif, 18 |
| 3.976065312 | M6prbp1       | mannose-6-phosphate receptor binding protein 1                                                |
| 3.976065312 | Ai427515      | expressed sequence Ai427515                                                                   |
| 3.976065312 | Mrpl50        | mitochondrial ribosomal protein L50                                                           |
| 3.976065312 | Krtcap2       | keratinocyte associated protein 2                                                             |
| 3.976065312 | Homer2        | homer homolog 2 (Drosophila)                                                                  |
| 3.976065312 | Ltbr          | lymphotoxin B receptor                                                                        |
| 3.976065312 | Det1          | de-etiolated homolog 1 (Arabidopsis)                                                          |
| 3.976065312 | Slc25a16      | solute carrier family 25 (mitochondrial carrier, Graves disease autoantigen), member 16       |
| 3.976065312 | Dnntip1       | deoxynucleotidyltransferase, terminal, interacting protein 1                                  |
| 3.976065312 | Fkbp4         | FK506 binding protein 4                                                                       |
| 3.976065312 | 1810057e01Rik | RIKEN cDNA 1810057E01 gene                                                                    |
| 3.976065312 | A130038l21Rik | RIKEN cDNA A130038L21 gene                                                                    |
| 3.976065312 | Iftm3         | interferon induced transmembrane protein 3                                                    |
| 3.976065312 | Mrpl10        | mitochondrial ribosomal protein L10                                                           |
| 3.976065312 | Mrpl13        | mitochondrial ribosomal protein L13                                                           |
| 3.976065312 | Hist1h1e      | histone 1, H1e                                                                                |
| 3.976065312 | Zbed3         | zinc finger, BED domain containing 3                                                          |

**Supplemental Table S2 Genes with increased expression (FDR < 5%) in control samples in Figure 2A as determined using Significance Analysis of Microarrays (SAM)**

| <b>FDR q-value (%)</b> | <b>Gene symbol</b> | <b>Gene name</b>                                                                              |
|------------------------|--------------------|-----------------------------------------------------------------------------------------------|
| 0                      | 5730557b15Rik      | RIKEN cDNA 5730557B15 gene                                                                    |
| 0                      | Cxcr4              | chemokine (C-X-C motif) receptor 4                                                            |
| 0                      | Clec4e             | C-type lectin domain family 4, member e                                                       |
| 0                      | Ptgs2              | prostaglandin-endoperoxide synthase 2                                                         |
| 0                      | Arl12              | ADP-ribosylation factor-like 12                                                               |
| 0                      | Ccl17              | chemokine (C-C motif) ligand 17                                                               |
| 0                      | Nfe2l2             | nuclear factor, erythroid derived 2, like 2                                                   |
| 0                      | Gadd45b            | growth arrest and DNA-damage-inducible 45 beta                                                |
| 0                      | Plaur              | urokinase plasminogen activator receptor                                                      |
| 0                      | Slc7a11            | solute carrier family 7 (cationic amino acid transporter, y+ system), member 11               |
| 0                      | Rel                | reticuloendotheliosis oncogene                                                                |
| 0                      | D16ertd472e        | DNA segment, Chr 16, ERATO Doi 472, expressed                                                 |
| 0                      | Ltb4r              | leukotriene B4 receptor                                                                       |
| 0                      | Bc036563           | cDNA sequence BC036563                                                                        |
| 0                      | Pscdbp             | pleckstrin homology, Sec7 and coiled-coil domains, binding protein                            |
| 0                      | Itgb7              | integrin beta 7                                                                               |
| 0                      | Il18rap            | interleukin 18 receptor accessory protein                                                     |
| 0                      | Ripk2              | receptor (TNFRSF)-interacting serine-threonine kinase 2                                       |
| 0                      | Csf2               | colony stimulating factor 2 (granulocyte-macrophage)                                          |
| 0                      | Map2k3             | mitogen activated protein kinase kinase 3                                                     |
| 0                      | Nfkbie             | nuclear factor of kappa light polypeptide gene enhancer in B-cells inhibitor, epsilon         |
| 0                      | Nfkbia             | nuclear factor of kappa light chain gene enhancer in B-cells inhibitor, alpha                 |
| 0                      | Pmaip1             | phorbol-12-myristate-13-acetate-induced protein 1                                             |
| 0                      | Amn                | amniotless                                                                                    |
| 0                      | Cflar              | CASP8 and FADD-like apoptosis regulator                                                       |
| 0                      | Cyld               | cylindromatosis (turban tumor syndrome)                                                       |
| 0                      | Prkab2             | protein kinase, AMP-activated, beta 2 non-catalytic subunit                                   |
| 0                      | Apaf1              | apoptotic protease activating factor 1                                                        |
| 0                      | Agpat4             | 1-acylglycerol-3-phosphate O-acyltransferase 1 (lysophosphatidic acid acyltransferase, delta) |
| 0                      | Bcor               | Bcl6 interacting corepressor                                                                  |
| 0                      | Olfir90            | olfactory receptor 90                                                                         |
| 0                      | Tank               | TRAF family member-associated Nf-kappa B activator                                            |
| 0                      | Bc026744           | cDNA sequence BC026744                                                                        |
| 0                      | Cdkn1a             | cyclin-dependent kinase inhibitor 1A (P21)                                                    |
| 0                      | Stk17b             | serine/threonine kinase 17b (apoptosis-inducing)                                              |
| 0                      | 5730438n18Rik      | RIKEN cDNA 5730438N18 gene                                                                    |
| 0                      | Relb               | avian reticuloendotheliosis viral (v-rel) oncogene related B                                  |
| 0                      | D330017j20Rik      | RIKEN cDNA D330017J20 gene                                                                    |
| 0                      | Hk2                | hexokinase 2                                                                                  |
| 0                      | Il17r              | interleukin 17 receptor                                                                       |
| 0                      | Krtap16-10         | keratin associated protein 16-10                                                              |
| 0                      | Cd274              | CD274 antigen                                                                                 |
| 0                      | 1300013d05Rik      | RIKEN cDNA 1300013D05 gene                                                                    |
| 0                      | 2600010e01Rik      | RIKEN cDNA 2600010E01 gene                                                                    |
| 0                      | Skil               | SKI-like                                                                                      |
| 0                      | Itgal              | integrin alpha L                                                                              |
| 0                      | Maff               | v-maf musculoaponeurotic fibrosarcoma oncogene family, protein F (avian)                      |
| 0                      | Fgr                | Gardner-Rasheed feline sarcoma viral (Fgr) oncogene homolog                                   |
| 0                      | Traf1              | Tnf receptor-associated factor 1                                                              |
| 0                      | Slc2a3             | solute carrier family 2 (facilitated glucose transporter), member 3                           |
| 0                      | Slk                | STE20-like kinase (yeast)                                                                     |
| 0                      | Bc003324           | cDNA sequence BC003324                                                                        |
| 0                      | Ripk3              | receptor-interacting serine-threonine kinase 3                                                |
| 0                      | Pim1               | proviral integration site 1                                                                   |
| 0                      | Mefv               | Mediterranean fever                                                                           |
| 0                      | Serpina3g          | serine (or cysteine) proteinase inhibitor, clade A, member 3G                                 |
| 0                      | Adam23             | a disintegrin and metalloprotease domain 23                                                   |
| 0.715434784            | Aw539457           | expressed sequence AW539457                                                                   |
| 0.715434784            | Chi3l3             | chitinase 3-like 3                                                                            |
| 0.715434784            | Sfrs15             | splicing factor, arginine/serine-rich 15                                                      |
| 0.715434784            | Bcl10              | B-cell leukemia/lymphoma 10                                                                   |
| 0.715434784            | Bcl2a1c            | B-cell leukemia/lymphoma 2 related protein A1c                                                |
| 0.715434784            | Ptk2b              | PTK2 protein tyrosine kinase 2 beta                                                           |
| 0.715434784            | Sec24a             | SEC24 related gene family, member A (S. cerevisiae)                                           |
| 0.715434784            | Dnajb6             | Dnaj (Hsp40) homolog, subfamily B, member 6                                                   |
| 0.715434784            | F10                | coagulation factor X                                                                          |
| 0.715434784            | Uvrag              | UV radiation resistance associated gene                                                       |
| 0.715434784            | Cicf1              | cardiotrophin-like cytokine factor 1                                                          |
| 0.715434784            | Kif21b             | kinesin family member 21B                                                                     |
| 0.735307972            | Slc6a13            | solute carrier family 6 (neurotransmitter transporter, GABA), member 13                       |



|             |               |                                                                                               |
|-------------|---------------|-----------------------------------------------------------------------------------------------|
| 0.735307972 | Ris2          | retroviral integration site 2                                                                 |
| 0.735307972 | Glipr1        | GLI pathogenesis-related 1 (glioma)                                                           |
| 0.735307972 | 2810451e09Rik | RIKEN cDNA 2810451E09 gene                                                                    |
| 0.735307972 | Il1b          | interleukin 1 beta                                                                            |
| 0.735307972 | Gpr35         | G protein-coupled receptor 35                                                                 |
| 0.860848358 | C330029b10Rik | RIKEN cDNA C330029B10 gene                                                                    |
| 0.860848358 | Nfkb2         | nuclear factor of kappa light polypeptide gene enhancer in B-cells 2, p49/p100                |
| 0.860848358 | Crem          | cAMP responsive element modulator                                                             |
| 0.860848358 | Cst7          | cystatin F (leukocystatin)                                                                    |
| 0.860848358 | Spata2        | spermatogenesis associated 2                                                                  |
| 0.860848358 | Arih1         | ariadne ubiquitin-conjugating enzyme E2 binding protein homolog 1 (Drosophila)                |
| 0.860848358 | C630002b14Rik | RIKEN cDNA C630002B14 gene                                                                    |
| 0.860848358 | Snap23        | synaptosomal-associated protein 23                                                            |
| 0.860848358 | F730043m19Rik | RIKEN cDNA F730043M19 gene                                                                    |
| 0.860848358 | Prosc         | proline synthetase co-transcribed                                                             |
| 0.860848358 | Fosl2         | fos-like antigen 2                                                                            |
| 0.860848358 | Galnt6        | UDP-N-acetyl-alpha-D-galactosamine:polypeptide N-acetylgalactosaminyltransferase 6            |
| 0.860848358 | Rec811        | REC8-like 1 (yeast)                                                                           |
| 1.011633898 | Parvg         | parvin, gamma                                                                                 |
| 1.011633898 | Icam5         | intercellular adhesion molecule 5, telencephalin                                              |
| 1.011633898 | Zfp364        | zinc finger protein 364                                                                       |
| 1.011633898 | A630033h20Rik | RIKEN cDNA A630033H20 gene                                                                    |
| 1.011633898 | 1810033b17Rik | RIKEN cDNA 1810033B17 gene                                                                    |
| 1.011633898 | Stk10         | serine/threonine kinase 10                                                                    |
| 1.011633898 | Pvr           | poliovirus receptor                                                                           |
| 1.011633898 | Tbc1d10c      | TBC1 domain family, member 10c                                                                |
| 1.011633898 | 1300013b24Rik | RIKEN cDNA 1300013B24 gene                                                                    |
| 1.011633898 | 9430023b20Rik | RIKEN cDNA 9430023B20 gene                                                                    |
| 1.011633898 | Bc034097      | cDNA sequence BC034097                                                                        |
| 1.011633898 | Siglec10      | sialic acid binding Ig-like lectin 10                                                         |
| 1.011633898 | Pfkfb3        | 6-phosphofructo-2-kinase/fructose-2,6-biphosphatase 3                                         |
| 1.011633898 | Clec7a        | C-type lectin domain family 7, member a                                                       |
| 1.011633898 | Cias1         | cold autoinflammatory syndrome 1 homolog (human)                                              |
| 1.011633898 | Card11        | caspase recruitment domain family, member 11                                                  |
| 1.011633898 | Ifrd1         | interferon-related developmental regulator 1                                                  |
| 1.157205989 | Cd52          | CD52 antigen                                                                                  |
| 1.157205989 | Spn           | sialophorin                                                                                   |
| 1.157205989 | Pygl          | liver glycogen phosphorylase                                                                  |
| 1.157205989 | Edem1         | ER degradation enhancer, mannosidase alpha-like 1                                             |
| 1.157205989 | Grap2         | GRB2-related adaptor protein 2                                                                |
| 1.157205989 | E2f2          | E2F transcription factor 2                                                                    |
| 1.242774037 | Plxnc1        | plexin C1                                                                                     |
| 1.242774037 | Rapgef6       | Rap guanine nucleotide exchange factor (GEF) 6                                                |
| 1.242774037 | Cd69          | CD69 antigen                                                                                  |
| 1.242774037 | Trerf1        | transcriptional regulating factor 1                                                           |
| 1.242774037 | Icoslg        | inducible T-cell co-stimulator ligand                                                         |
| 1.242774037 | Litaf         | LPS-induced TN factor                                                                         |
| 1.242774037 | Pdxdp         | pyridoxal (pyridoxine, vitamin B6) phosphatase                                                |
| 1.242774037 | 5830405n20Rik | RIKEN cDNA 5830405N20 gene                                                                    |
| 1.242774037 | 9130017c17Rik | RIKEN cDNA 9130017C17 gene                                                                    |
| 1.298581626 | Lmnb1         | lamin B1                                                                                      |
| 1.298581626 | B430306n03Rik | RIKEN cDNA B430306N03 gene                                                                    |
| 1.298581626 | Ptpn22        | protein tyrosine phosphatase, non-receptor type 22 (lymphoid)                                 |
| 1.298581626 | Mgat4a        | mannoside acetylglucosaminyltransferase 4, isoenzyme A                                        |
| 1.298581626 | Tob2          | transducer of ERBB2, 2                                                                        |
| 1.298581626 | Mtmr4         | myotubularin related protein 4                                                                |
| 1.298581626 | H2-Oa         | histocompatibility 2, O region alpha locus                                                    |
| 1.298581626 | Tlr2          | toll-like receptor 2                                                                          |
| 1.298581626 | Ches1         | checkpoint suppressor 1                                                                       |
| 1.557122764 | Erf           | Ets2 repressor factor                                                                         |
| 1.557122764 | Arhgdib       | Rho, GDP dissociation inhibitor (GDI) beta                                                    |
| 1.557122764 | Nfatc2ip      | nuclear factor of activated T-cells, cytoplasmic, calcineurin-dependent 2 interacting protein |
| 1.557122764 | Fosl1         | fos-like antigen 1                                                                            |
| 1.557122764 | Prkx          | protein kinase, X-linked                                                                      |
| 1.557122764 | Gch1          | GTP cyclohydrolase 1                                                                          |
| 1.557122764 | Adam30        | a disintegrin and metalloproteinase domain 30                                                 |
| 1.626714843 | Tmem39a       | transmembrane protein 39a                                                                     |
| 1.626714843 | Lass6         | longevity assurance homolog 6 (S. cerevisiae)                                                 |
| 1.626714843 | Prkcd         | protein kinase C, delta                                                                       |
| 1.626714843 | Stk4          | serine/threonine kinase 4                                                                     |
| 1.626714843 | Pank2         | pantothenate kinase 2 (Hallervorden-Spatz syndrome)                                           |
| 1.626714843 | Ccl9          | chemokine (C-C motif) ligand 9                                                                |

|             |               |                                                                                   |
|-------------|---------------|-----------------------------------------------------------------------------------|
| 1.626714843 | Napa          | N-ethylmaleimide sensitive fusion protein attachment protein alpha                |
| 1.626714843 | Serpinc1      | serine (or cysteine) proteinase inhibitor, clade C (antithrombin), member 1       |
| 1.626714843 | Loc223262     | similar to small zinc finger-like protein                                         |
| 1.626714843 | Cbx4          | chromobox homolog 4 (Drosophila Pc class)                                         |
| 1.626714843 | 2310075c12Rik | RIKEN cDNA 2310075C12 gene                                                        |
| 1.626714843 | Rcor1         | REST corepressor 1                                                                |
| 1.895021888 | Tnf           | tumor necrosis factor                                                             |
| 1.895021888 | Eif5          | eukaryotic translation initiation factor 5                                        |
| 1.895021888 | 5830446m03Rik | RIKEN cDNA 5830446M03 gene                                                        |
| 1.895021888 | Zfp263        | zinc finger protein 263                                                           |
| 2.021069957 | Cacnb3        | calcium channel, voltage-dependent, beta 3 subunit                                |
| 2.021069957 | Pdcd1         | programmed cell death 1                                                           |
| 2.021069957 | Sesn2         | sestrin 2                                                                         |
| 2.021069957 | Slc38a1       | solute carrier family 38, member 1                                                |
| 2.021069957 | Itpkc         | inositol 1,4,5-trisphosphate 3-kinase C                                           |
| 2.188047709 | Cry1          | cryptochrome 1 (photolyase-like)                                                  |
| 2.188047709 | Av312086      | expressed sequence AV312086                                                       |
| 2.188047709 | Etf1          | eukaryotic translation termination factor 1                                       |
| 2.188047709 | 5730511k23Rik | RIKEN cDNA 5730511K23 gene                                                        |
| 2.188047709 | Dna2l         | DNA2 DNA replication helicase 2-like (yeast)                                      |
| 2.188047709 | 2610024e20Rik | RIKEN cDNA 2610024E20 gene                                                        |
| 2.188047709 | 2410025l10Rik | RIKEN cDNA 2410025L10 gene                                                        |
| 2.188047709 | Bcl2l11       | BCL2-like 11 (apoptosis facilitator)                                              |
| 2.188047709 | 5830408c22Rik | RIKEN cDNA 5830408C22 gene                                                        |
| 2.324098412 | Lyst          | lysosomal trafficking regulator                                                   |
| 2.324098412 | Pscd1         | pleckstrin homology, Sec7 and coiled-coil domains 1                               |
| 2.324098412 | Runx3         | runt related transcription factor 3                                               |
| 2.324098412 | Csrp3         | cysteine and glycine-rich protein 3 (cardiac LIM protein)                         |
| 2.324098412 | Dapp1         | dual adaptor for phosphotyrosine and 3-phosphoinositides 1                        |
| 2.324098412 | Il2rb         | interleukin 2 receptor, beta chain                                                |
| 2.324098412 | Impact        | imprinted and ancient                                                             |
| 2.324098412 | Iqgap1        | IQ motif containing GTPase activating protein 1                                   |
| 2.324098412 | Gpr162        | G protein-coupled receptor 162                                                    |
| 2.324098412 | Map3k5        | mitogen activated protein kinase kinase kinase 5                                  |
| 2.324098412 | Bc031781      | cDNA sequence BC031781                                                            |
| 2.324098412 | Gbp5          | guanylate nucleotide binding protein 5                                            |
| 2.324098412 | Zswim4        | zinc finger, SWIM domain containing 4                                             |
| 2.324098412 | Sema7a        | sema domain, immunoglobulin domain (Ig), and GPI membrane anchor, (semaphorin) 7A |
| 2.324098412 | Ikbbk         | inhibitor of kappaB kinase beta                                                   |
| 2.324098412 | 4930563d23Rik | RIKEN cDNA 4930563D23 gene                                                        |
| 2.324098412 | 5830461h18Rik | RIKEN cDNA 5830461H18 gene                                                        |
| 2.324098412 | B4galt5       | UDP-Gal:betaGlcNAc beta 1,4-galactosyltransferase, polypeptide 5                  |
| 2.324098412 | Cxcl2         | chemokine (C-X-C motif) ligand 2                                                  |
| 2.433004319 | Trim36        | tripartite motif-containing 36                                                    |
| 2.433004319 | Epsti1        | epithelial stromal interaction 1 (breast)                                         |
| 2.433004319 | Tnfaip2       | tumor necrosis factor, alpha-induced protein 2                                    |
| 2.433004319 | Icam1         | intercellular adhesion molecule                                                   |
| 2.433004319 | Cyp4f16       | cytochrome P450, family 4, subfamily f, polypeptide 16                            |
| 2.433004319 | Nppb          | natriuretic peptide precursor type B                                              |
| 2.433004319 | Dyrk1a        | dual-specificity tyrosine-(Y)-phosphorylation regulated kinase 1a                 |
| 2.433004319 | Slc15a3       | solute carrier family 15, member 3                                                |
| 2.433004319 | C530009c10Rik | RIKEN cDNA C530009C10 gene                                                        |
| 2.433004319 | Marco         | macrophage receptor with collagenous structure                                    |
| 2.433004319 | Cish          | cytokine inducible SH2-containing protein                                         |
| 2.433004319 | 4930406m16Rik | RIKEN cDNA 4930406M16 gene                                                        |
| 2.433004319 | Frat2         | frequently rearranged in advanced T-cell lymphomas 2                              |
| 2.433004319 | Itgax         | integrin alpha X                                                                  |
| 2.433004319 | Dusp2         | dual specificity phosphatase 2                                                    |
| 2.433004319 | Vezf1         | vascular endothelial zinc finger 1                                                |
| 2.433004319 | Abca7         | ATP-binding cassette, sub-family A (ABC1), member 7                               |
| 2.433004319 | Plcg2         | phospholipase C, gamma 2                                                          |
| 2.433004319 | Rfx1          | regulatory factor X, 1 (influences HLA class II expression)                       |
| 2.433004319 | Plk3          | polo-like kinase 3 (Drosophila)                                                   |
| 2.433004319 | Emilin2       | elastin microfibril interfacier 2                                                 |
| 2.433004319 | Mef2d         | myocyte enhancer factor 2D                                                        |
| 2.433004319 | 9430034d17Rik | RIKEN cDNA 9430034D17 gene                                                        |
| 2.433004319 | MGI:1298390   | SWA-70 protein                                                                    |
| 2.433004319 | Aqp3          | aquaporin 3                                                                       |
| 2.433004319 | Bc019206      | cDNA sequence BC019206                                                            |
| 2.799303861 | Bri3bp        | Bri3 binding protein                                                              |
| 2.799303861 | Rnf36         | ring finger protein 36                                                            |
| 2.799303861 | Ifi30         | interferon gamma inducible protein 30                                             |

|             |               |                                                                          |
|-------------|---------------|--------------------------------------------------------------------------|
| 2.799303861 | F730004d16Rik | RIKEN cDNA F730004D16 gene                                               |
| 2.799303861 | 2010002n04Rik | RIKEN cDNA 2010002N04 gene                                               |
| 2.799303861 | Ear11         | eosinophil-associated, ribonuclease A family, member 11                  |
| 2.799303861 | Dpp4          | dipeptidylpeptidase 4                                                    |
| 2.799303861 | Usp38         | ubiquitin specific protease 38                                           |
| 2.799303861 | Nfe2          | nuclear factor, erythroid derived 2                                      |
| 2.799303861 | Pole4         | polymerase (DNA-directed), epsilon 4 (p12 subunit)                       |
| 2.799303861 | Btbd4         | BTB (POZ) domain containing 4                                            |
| 2.799303861 | 9930117h01Rik | RIKEN cDNA 9930117H01 gene                                               |
| 2.799303861 | MGI:2429944   | lung-inducible neuralized-related C3HC4 RING domain protein              |
| 2.799303861 | Chrd          | chordin                                                                  |
| 2.799303861 | D730019b10Rik | RIKEN cDNA D730019B10 gene                                               |
| 2.799303861 | Kpna4         | karyopherin (importin) alpha 4                                           |
| 2.799303861 | Slpi          | secretory leukocyte protease inhibitor                                   |
| 2.799303861 | E130115j16Rik | RIKEN cDNA E130115J16 gene                                               |
| 2.799303861 | 5830435k17Rik | RIKEN cDNA 5830435K17 gene                                               |
| 2.799303861 | Lmna          | lamin A                                                                  |
| 3.425670081 | Mcl1          | myeloid cell leukemia sequence 1                                         |
| 3.425670081 | Pspc1         | paraspeckle protein 1                                                    |
| 3.425670081 | Ddx25         | DEAD (Asp-Glu-Ala-Asp) box polypeptide 25                                |
| 3.425670081 | Hbegf         | heparin-binding EGF-like growth factor                                   |
| 3.425670081 | Prodh2        | proline dehydrogenase (oxidase) 2                                        |
| 3.425670081 | Fscn1         | fascin homolog 1, actin bundling protein (Strongylocentrotus purpuratus) |
| 3.425670081 | 4833422f24Rik | RIKEN cDNA 4833422F24 gene                                               |
| 3.425670081 | Bmp2k         | BMP2 inducible kinase                                                    |
| 3.425670081 | Cxcl16        | chemokine (C-X-C motif) ligand 16                                        |
| 3.425670081 | Ifngr1        | interferon gamma receptor 1                                              |
| 3.425670081 | Map3k14       | mitogen-activated protein kinase kinase 14                               |
| 3.425670081 | Tiparp        | TCDD-inducible poly(ADP-ribose) polymerase                               |
| 3.425670081 | 6530401c20Rik | RIKEN cDNA 6530401C20 gene                                               |
| 3.425670081 | Tbx21         | T-box 21                                                                 |
| 3.976065312 | Lnpep         | leucyl/cystinyl aminopeptidase                                           |
| 3.976065312 | 5730509c05Rik | RIKEN cDNA 5730509C05 gene                                               |
| 3.976065312 | Olr1          | oxidized low density lipoprotein (lectin-like) receptor 1                |
| 3.976065312 | Atp4a         | ATPase, H+/K+ transporting, alpha polypeptide                            |
| 3.976065312 | 6330407g11Rik | RIKEN cDNA 6330407G11 gene                                               |
| 3.976065312 | Ms4a6c        | membrane-spanning 4-domains, subfamily A, member 6C                      |
| 3.976065312 | Gvin1         | GTPase, very large interferon inducible 1                                |
| 3.976065312 | Lrrk1         | leucine-rich repeat kinase 1                                             |
| 3.976065312 | MGI:1351468   | cytokine-dependent hematopoietic cell linker                             |
| 3.976065312 | Amica1        | adhesion molecule that interacts with CXADR antigen 1                    |
